# Supplementary material
Source: publisher figshare collection journal article supplement (https://acs.figshare.com/ndownloader/files/3599505)
Supplement: Supplementary file 1 [file 3599505]

data_publication_text
_publ_requested_journal          J.Am.Chem.Soc.
_publ_contact_author_name        'Stephen J. Lippard'
_publ_contact_author_address     
;77 Massachusetts Ave, 18-498
Cambridge, MA 02139
;
_publ_contact_author_email       lippard@mit.edu
_publ_contact_author_phone       (617)253-1892
_publ_contact_author_fax         (617)258-8150
loop_
_publ_author_name
_publ_author_address
'Johnstone, Timothy C.'
;77 Massachusetts Ave, 18-443
Cambridge, MA 02139
;
'Lippard, Stephen J.'
;77 Massachusetts Ave, 18-498
Cambridge, MA 02139
; 


data_1 
 
_audit_creation_method            SHELXL-97 
_chemical_name_systematic 
; 
 ? 
; 
_chemical_name_common             ? 
_chemical_melting_point           ? 
_chemical_formula_moiety          'C13 H15 Cl N3 Pt, C F3 O3 S' 
_chemical_formula_sum 
 'C14 H15 Cl F3 N3 O3 Pt S' 
_chemical_formula_weight          592.89 
 
loop_ 
 _atom_type_symbol 
 _atom_type_description 
 _atom_type_scat_dispersion_real 
 _atom_type_scat_dispersion_imag 
 _atom_type_scat_source 
 'C'  'C'   0.0033   0.0016 
 'International Tables Vol C Tables 4.2.6.8 and 6.1.1.4' 
 'H'  'H'   0.0000   0.0000 
 'International Tables Vol C Tables 4.2.6.8 and 6.1.1.4' 
 'N'  'N'   0.0061   0.0033 
 'International Tables Vol C Tables 4.2.6.8 and 6.1.1.4' 
 'O'  'O'   0.0106   0.0060 
 'International Tables Vol C Tables 4.2.6.8 and 6.1.1.4' 
 'F'  'F'   0.0171   0.0103 
 'International Tables Vol C Tables 4.2.6.8 and 6.1.1.4' 
 'S'  'S'   0.1246   0.1234 
 'International Tables Vol C Tables 4.2.6.8 and 6.1.1.4' 
 'Cl'  'Cl'   0.1484   0.1585 
 'International Tables Vol C Tables 4.2.6.8 and 6.1.1.4' 
 'Pt'  'Pt'  -1.7033   8.3905 
 'International Tables Vol C Tables 4.2.6.8 and 6.1.1.4' 
 
_symmetry_cell_setting            Orthorhombic 
_symmetry_space_group_name_H-M    Pbca 
 
loop_ 
 _symmetry_equiv_pos_as_xyz 
 'x, y, z' 
 '-x+1/2, -y, z+1/2' 
 '-x, y+1/2, -z+1/2' 
 'x+1/2, -y+1/2, -z' 
 '-x, -y, -z' 
 'x-1/2, y, -z-1/2' 
 'x, -y-1/2, z-1/2' 
 '-x-1/2, y-1/2, z' 
 
_cell_length_a                    12.8700(12) 
_cell_length_b                    9.8433(9) 
_cell_length_c                    28.980(3) 
_cell_angle_alpha                 90.00 
_cell_angle_beta                  90.00 
_cell_angle_gamma                 90.00 
_cell_volume                      3671.3(6) 
_cell_formula_units_Z             8 
_cell_measurement_temperature     100(2) 
_cell_measurement_reflns_used     9250
_cell_measurement_theta_min       2.70
_cell_measurement_theta_max       28.74
 
_exptl_crystal_description        Needle 
_exptl_crystal_colour             Colourless 
_exptl_crystal_size_max           0.40 
_exptl_crystal_size_mid           0.04 
_exptl_crystal_size_min           0.03 
_exptl_crystal_density_meas       ? 
_exptl_crystal_density_diffrn     2.145 
_exptl_crystal_density_method     'not measured' 
_exptl_crystal_F_000              2256 
_exptl_absorpt_coefficient_mu     7.952 
_exptl_absorpt_correction_type    'multi-scan' 
_exptl_absorpt_correction_T_min   0.1431 
_exptl_absorpt_correction_T_max   0.7964 
_exptl_absorpt_process_details    'Blessing, 1995' 
 
_exptl_special_details 
; 
 ? 
; 
 
_diffrn_ambient_temperature       100(2) 
_diffrn_radiation_wavelength      0.71073 
_diffrn_radiation_type            MoK\a 
_diffrn_radiation_source          'fine-focus sealed tube' 
_diffrn_radiation_monochromator   graphite 
_diffrn_measurement_device_type  'CCD area detector'
_diffrn_measurement_method       'phi and omega scans'
_diffrn_detector_area_resol_mean  ? 
_diffrn_standards_number          ? 
_diffrn_standards_interval_count  ? 
_diffrn_standards_interval_time   ? 
_diffrn_standards_decay_%         ? 
_diffrn_reflns_number             55588 
_diffrn_reflns_av_R_equivalents   0.0399 
_diffrn_reflns_av_sigmaI/netI     0.0184 
_diffrn_reflns_limit_h_min        -17 
_diffrn_reflns_limit_h_max        17 
_diffrn_reflns_limit_k_min        -13 
_diffrn_reflns_limit_k_max        13 
_diffrn_reflns_limit_l_min        -39 
_diffrn_reflns_limit_l_max        39 
_diffrn_reflns_theta_min          1.41 
_diffrn_reflns_theta_max          28.74 
_reflns_number_total              4763 
_reflns_number_gt                 4052 
_reflns_threshold_expression      >2sigma(I) 
 
_computing_data_collection      'Bruker SMART'
_computing_cell_refinement      'Bruker SMART'
_computing_data_reduction       'Bruker SAINT'
_computing_structure_solution   'Bruker SHELXTL'
_computing_structure_refinement 'Bruker SHELXTL'
_computing_molecular_graphics   'Bruker SHELXTL'
_computing_publication_material 'Bruker SHELXTL'
 
_refine_special_details 
; 
 Refinement of F^2^ against ALL reflections.  The weighted R-factor wR and 
 goodness of fit S are based on F^2^, conventional R-factors R are based 
 on F, with F set to zero for negative F^2^. The threshold expression of 
 F^2^ > 2sigma(F^2^) is used only for calculating R-factors(gt) etc. and is 
 not relevant to the choice of reflections for refinement.  R-factors based 
 on F^2^ are statistically about twice as large as those based on F, and R- 
 factors based on ALL data will be even larger. 
; 
 
_refine_ls_structure_factor_coef  Fsqd  
_refine_ls_matrix_type            full 
_refine_ls_weighting_scheme       calc  
_refine_ls_weighting_details 
 'calc w=1/[\s^2^(Fo^2^)+(0.0159P)^2^+3.4494P] where P=(Fo^2^+2Fc^2^)/3' 
_atom_sites_solution_primary      heavy
_atom_sites_solution_secondary    difmap 
_atom_sites_solution_hydrogens    geom 
_refine_ls_hydrogen_treatment     constr
_refine_ls_extinction_method      none 
_refine_ls_extinction_coef        ? 
_refine_ls_number_reflns          4763 
_refine_ls_number_parameters      237 
_refine_ls_number_restraints      0 
_refine_ls_R_factor_all           0.0284 
_refine_ls_R_factor_gt            0.0202 
_refine_ls_wR_factor_ref          0.0426 
_refine_ls_wR_factor_gt           0.0398 
_refine_ls_goodness_of_fit_ref    1.116 
_refine_ls_restrained_S_all       1.116 
_refine_ls_shift/su_max           0.002 
_refine_ls_shift/su_mean          0.000 
 
loop_ 
 _atom_site_label 
 _atom_site_type_symbol 
 _atom_site_fract_x 
 _atom_site_fract_y 
 _atom_site_fract_z 
 _atom_site_U_iso_or_equiv 
 _atom_site_adp_type 
 _atom_site_occupancy 
 _atom_site_symmetry_multiplicity 
 _atom_site_calc_flag 
 _atom_site_refinement_flags 
 _atom_site_disorder_assembly 
 _atom_site_disorder_group 
Pt1 Pt -0.263839(7) 0.620738(10) 0.658136(3) 0.01344(3) Uani 1 1 d . . . 
Cl1 Cl -0.38785(5) 0.74687(7) 0.62059(2) 0.01965(14) Uani 1 1 d . . . 
S1S S -0.36971(5) 0.29877(7) 0.78615(2) 0.01726(14) Uani 1 1 d . . . 
F3S F -0.24077(14) 0.3533(2) 0.85347(7) 0.0350(5) Uani 1 1 d . . . 
F2S F -0.22000(15) 0.1566(2) 0.82282(7) 0.0344(5) Uani 1 1 d . . . 
N1 N -0.35079(17) 0.6246(2) 0.71695(8) 0.0183(5) Uani 1 1 d . . . 
H1A H -0.3257 0.6895 0.7363 0.027 Uiso 1 1 calc R . . 
H1B H -0.3475 0.5421 0.7311 0.027 Uiso 1 1 calc R . . 
H1C H -0.4180 0.6438 0.7097 0.027 Uiso 1 1 calc R . . 
N3 N -0.18173(16) 0.6201(2) 0.59853(8) 0.0162(4) Uani 1 1 d . . . 
F1S F -0.34917(14) 0.19345(19) 0.86859(6) 0.0295(4) Uani 1 1 d . . . 
O3S O -0.29187(16) 0.3416(2) 0.75289(7) 0.0238(4) Uani 1 1 d . . . 
C7 C -0.0994(2) 0.6368(3) 0.50818(10) 0.0203(6) Uani 1 1 d . . . 
C6 C -0.0636(2) 0.6387(3) 0.46207(11) 0.0272(7) Uani 1 1 d . . . 
H6 H -0.0172 0.7081 0.4523 0.033 Uiso 1 1 calc R . . 
O2S O -0.43475(15) 0.4065(2) 0.80282(8) 0.0268(5) Uani 1 1 d . . . 
N2 N -0.15452(17) 0.5080(2) 0.69225(7) 0.0172(5) Uani 1 1 d . . . 
H2A H -0.1123 0.4664 0.6714 0.026 Uiso 1 1 calc R . . 
H2B H -0.1867 0.4441 0.7099 0.026 Uiso 1 1 calc R . . 
H2C H -0.1159 0.5634 0.7107 0.026 Uiso 1 1 calc R . . 
C1S C -0.2908(2) 0.2485(3) 0.83557(10) 0.0220(6) Uani 1 1 d . . . 
C8 C -0.0668(2) 0.7322(3) 0.54313(10) 0.0203(6) Uani 1 1 d . . . 
O1S O -0.42208(16) 0.1746(2) 0.77340(7) 0.0266(5) Uani 1 1 d . . . 
C13 C -0.1083(2) 0.7202(3) 0.58823(10) 0.0188(6) Uani 1 1 d . . . 
C3 C -0.2016(2) 0.4354(3) 0.48885(10) 0.0260(7) Uani 1 1 d . . . 
H3 H -0.2488 0.3661 0.4978 0.031 Uiso 1 1 calc R . . 
C5 C -0.0953(2) 0.5419(3) 0.43132(11) 0.0287(7) Uani 1 1 d . . . 
H5 H -0.0701 0.5444 0.4005 0.034 Uiso 1 1 calc R . . 
C2 C -0.1699(2) 0.5340(3) 0.52087(10) 0.0198(6) Uani 1 1 d . . . 
C12 C -0.0767(2) 0.8086(3) 0.62322(11) 0.0212(6) Uani 1 1 d . . . 
H12 H -0.1046 0.7991 0.6534 0.025 Uiso 1 1 calc R . . 
C1 C -0.2091(2) 0.5325(3) 0.56675(9) 0.0191(6) Uani 1 1 d . . . 
H1 H -0.2579 0.4641 0.5748 0.023 Uiso 1 1 calc R . . 
C10 C 0.0353(3) 0.9234(3) 0.56979(13) 0.0326(8) Uani 1 1 d . . . 
H10 H 0.0842 0.9933 0.5635 0.039 Uiso 1 1 calc R . . 
C11 C -0.0051(2) 0.9096(3) 0.61427(12) 0.0296(7) Uani 1 1 d . . . 
H11 H 0.0165 0.9692 0.6382 0.035 Uiso 1 1 calc R . . 
C9 C 0.0052(2) 0.8373(3) 0.53496(12) 0.0302(7) Uani 1 1 d . . . 
H9 H 0.0333 0.8488 0.5049 0.036 Uiso 1 1 calc R . . 
C4 C -0.1643(2) 0.4393(4) 0.44457(11) 0.0305(7) Uani 1 1 d . . . 
H4 H -0.1852 0.3723 0.4229 0.037 Uiso 1 1 calc R . . 
 
loop_ 
 _atom_site_aniso_label 
 _atom_site_aniso_U_11 
 _atom_site_aniso_U_22 
 _atom_site_aniso_U_33 
 _atom_site_aniso_U_23 
 _atom_site_aniso_U_13 
 _atom_site_aniso_U_12 
Pt1 0.01111(5) 0.01555(5) 0.01366(5) 0.00242(4) -0.00021(3) 0.00014(4) 
Cl1 0.0181(3) 0.0225(3) 0.0184(3) 0.0035(3) -0.0032(2) 0.0042(3) 
S1S 0.0129(3) 0.0213(3) 0.0176(3) 0.0047(3) 0.0009(2) 0.0004(3) 
F3S 0.0269(10) 0.0426(12) 0.0354(10) -0.0078(9) -0.0077(8) -0.0078(8) 
F2S 0.0326(10) 0.0415(11) 0.0292(10) 0.0066(9) 0.0015(8) 0.0216(9) 
N1 0.0157(11) 0.0202(12) 0.0190(11) 0.0029(10) 0.0004(8) 0.0036(10) 
N3 0.0144(10) 0.0176(11) 0.0167(11) 0.0042(10) -0.0002(8) 0.0015(9) 
F1S 0.0327(10) 0.0357(11) 0.0201(9) 0.0094(8) 0.0038(7) 0.0023(8) 
O3S 0.0199(10) 0.0281(11) 0.0236(10) 0.0102(9) 0.0068(8) 0.0008(9) 
C7 0.0162(12) 0.0231(15) 0.0217(14) 0.0082(12) 0.0019(10) 0.0040(11) 
C6 0.0235(15) 0.0320(18) 0.0260(16) 0.0090(14) 0.0073(12) 0.0049(13) 
O2S 0.0187(10) 0.0263(12) 0.0352(12) 0.0065(10) 0.0057(9) 0.0082(9) 
N2 0.0160(11) 0.0197(12) 0.0160(11) 0.0022(9) 0.0009(8) 0.0023(9) 
C1S 0.0206(14) 0.0237(15) 0.0216(15) 0.0025(12) 0.0002(11) 0.0022(12) 
C8 0.0176(13) 0.0184(15) 0.0248(15) 0.0037(12) 0.0041(11) 0.0022(11) 
O1S 0.0228(11) 0.0321(12) 0.0249(11) -0.0044(10) 0.0016(9) -0.0072(9) 
C13 0.0132(12) 0.0171(14) 0.0259(15) 0.0061(12) 0.0021(11) 0.0018(10) 
C3 0.0219(14) 0.0340(17) 0.0222(15) -0.0028(13) -0.0016(12) -0.0050(13) 
C5 0.0263(16) 0.041(2) 0.0191(15) 0.0048(14) 0.0037(12) 0.0109(14) 
C2 0.0160(12) 0.0254(15) 0.0180(14) 0.0027(12) -0.0016(10) 0.0019(11) 
C12 0.0158(13) 0.0203(15) 0.0275(15) 0.0002(12) 0.0014(11) 0.0033(11) 
C1 0.0170(13) 0.0212(14) 0.0190(13) 0.0035(11) -0.0008(10) -0.0025(11) 
C10 0.0272(16) 0.0213(16) 0.049(2) 0.0000(15) 0.0095(15) -0.0075(13) 
C11 0.0204(15) 0.0231(17) 0.045(2) -0.0036(15) 0.0017(13) -0.0019(12) 
C9 0.0272(16) 0.0250(16) 0.0385(19) 0.0053(14) 0.0121(14) -0.0023(13) 
C4 0.0265(16) 0.044(2) 0.0211(15) -0.0047(14) -0.0041(12) 0.0039(15) 
 
_geom_special_details 
; 
 All esds (except the esd in the dihedral angle between two l.s. planes) 
 are estimated using the full covariance matrix.  The cell esds are taken 
 into account individually in the estimation of esds in distances, angles 
 and torsion angles; correlations between esds in cell parameters are only 
 used when they are defined by crystal symmetry.  An approximate (isotropic) 
 treatment of cell esds is used for estimating esds involving l.s. planes. 
; 
 
loop_ 
 _geom_bond_atom_site_label_1 
 _geom_bond_atom_site_label_2 
 _geom_bond_distance 
 _geom_bond_site_symmetry_2 
 _geom_bond_publ_flag 
Pt1 N3 2.025(2) . ? 
Pt1 N1 2.039(2) . ? 
Pt1 N2 2.047(2) . ? 
Pt1 Cl1 2.2962(7) . ? 
S1S O2S 1.435(2) . ? 
S1S O1S 1.444(2) . ? 
S1S O3S 1.453(2) . ? 
S1S C1S 1.824(3) . ? 
F3S C1S 1.323(3) . ? 
F2S C1S 1.336(3) . ? 
N3 C1 1.310(3) . ? 
N3 C13 1.397(3) . ? 
F1S C1S 1.332(3) . ? 
C7 C2 1.408(4) . ? 
C7 C6 1.413(4) . ? 
C7 C8 1.444(4) . ? 
C6 C5 1.367(5) . ? 
C8 C9 1.409(4) . ? 
C8 C13 1.417(4) . ? 
C13 C12 1.397(4) . ? 
C3 C4 1.371(4) . ? 
C3 C2 1.404(4) . ? 
C5 C4 1.398(5) . ? 
C2 C1 1.422(4) . ? 
C12 C11 1.380(4) . ? 
C10 C9 1.374(5) . ? 
C10 C11 1.396(5) . ? 
 
loop_ 
 _geom_angle_atom_site_label_1 
 _geom_angle_atom_site_label_2 
 _geom_angle_atom_site_label_3 
 _geom_angle 
 _geom_angle_site_symmetry_1 
 _geom_angle_site_symmetry_3 
 _geom_angle_publ_flag 
N3 Pt1 N1 177.97(9) . . ? 
N3 Pt1 N2 92.96(9) . . ? 
N1 Pt1 N2 89.05(9) . . ? 
N3 Pt1 Cl1 87.72(6) . . ? 
N1 Pt1 Cl1 90.27(6) . . ? 
N2 Pt1 Cl1 179.31(6) . . ? 
O2S S1S O1S 116.07(13) . . ? 
O2S S1S O3S 114.28(12) . . ? 
O1S S1S O3S 113.44(13) . . ? 
O2S S1S C1S 105.14(13) . . ? 
O1S S1S C1S 103.37(13) . . ? 
O3S S1S C1S 102.45(13) . . ? 
C1 N3 C13 119.7(2) . . ? 
C1 N3 Pt1 117.50(18) . . ? 
C13 N3 Pt1 122.21(18) . . ? 
C2 C7 C6 117.8(3) . . ? 
C2 C7 C8 118.1(3) . . ? 
C6 C7 C8 124.1(3) . . ? 
C5 C6 C7 120.7(3) . . ? 
F3S C1S F1S 108.1(2) . . ? 
F3S C1S F2S 107.8(2) . . ? 
F1S C1S F2S 107.9(2) . . ? 
F3S C1S S1S 111.5(2) . . ? 
F1S C1S S1S 111.1(2) . . ? 
F2S C1S S1S 110.3(2) . . ? 
C9 C8 C13 117.7(3) . . ? 
C9 C8 C7 123.4(3) . . ? 
C13 C8 C7 118.9(3) . . ? 
C12 C13 N3 118.8(3) . . ? 
C12 C13 C8 120.5(3) . . ? 
N3 C13 C8 120.7(3) . . ? 
C4 C3 C2 119.8(3) . . ? 
C6 C5 C4 120.9(3) . . ? 
C3 C2 C7 120.8(3) . . ? 
C3 C2 C1 120.5(3) . . ? 
C7 C2 C1 118.7(3) . . ? 
C11 C12 C13 120.5(3) . . ? 
N3 C1 C2 123.7(3) . . ? 
C9 C10 C11 120.9(3) . . ? 
C12 C11 C10 119.5(3) . . ? 
C10 C9 C8 121.0(3) . . ? 
C3 C4 C5 120.0(3) . . ? 
 
loop_ 
 _geom_torsion_atom_site_label_1 
 _geom_torsion_atom_site_label_2 
 _geom_torsion_atom_site_label_3 
 _geom_torsion_atom_site_label_4 
 _geom_torsion 
 _geom_torsion_site_symmetry_1 
 _geom_torsion_site_symmetry_2 
 _geom_torsion_site_symmetry_3 
 _geom_torsion_site_symmetry_4 
 _geom_torsion_publ_flag 
N2 Pt1 N3 C1 99.3(2) . . . . ? 
Cl1 Pt1 N3 C1 -80.54(19) . . . . ? 
N2 Pt1 N3 C13 -89.5(2) . . . . ? 
Cl1 Pt1 N3 C13 90.61(19) . . . . ? 
C2 C7 C6 C5 -1.3(4) . . . . ? 
C8 C7 C6 C5 177.7(3) . . . . ? 
O2S S1S C1S F3S -54.5(2) . . . . ? 
O1S S1S C1S F3S -176.7(2) . . . . ? 
O3S S1S C1S F3S 65.2(2) . . . . ? 
O2S S1S C1S F1S 66.1(2) . . . . ? 
O1S S1S C1S F1S -56.0(2) . . . . ? 
O3S S1S C1S F1S -174.1(2) . . . . ? 
O2S S1S C1S F2S -174.2(2) . . . . ? 
O1S S1S C1S F2S 63.6(2) . . . . ? 
O3S S1S C1S F2S -54.5(2) . . . . ? 
C2 C7 C8 C9 178.4(3) . . . . ? 
C6 C7 C8 C9 -0.6(4) . . . . ? 
C2 C7 C8 C13 -1.2(4) . . . . ? 
C6 C7 C8 C13 179.8(3) . . . . ? 
C1 N3 C13 C12 -177.1(2) . . . . ? 
Pt1 N3 C13 C12 12.0(3) . . . . ? 
C1 N3 C13 C8 3.1(4) . . . . ? 
Pt1 N3 C13 C8 -167.8(2) . . . . ? 
C9 C8 C13 C12 -1.2(4) . . . . ? 
C7 C8 C13 C12 178.4(3) . . . . ? 
C9 C8 C13 N3 178.6(3) . . . . ? 
C7 C8 C13 N3 -1.8(4) . . . . ? 
C7 C6 C5 C4 0.5(5) . . . . ? 
C4 C3 C2 C7 -0.4(4) . . . . ? 
C4 C3 C2 C1 179.1(3) . . . . ? 
C6 C7 C2 C3 1.3(4) . . . . ? 
C8 C7 C2 C3 -177.8(3) . . . . ? 
C6 C7 C2 C1 -178.2(3) . . . . ? 
C8 C7 C2 C1 2.7(4) . . . . ? 
N3 C13 C12 C11 -179.3(3) . . . . ? 
C8 C13 C12 C11 0.5(4) . . . . ? 
C13 N3 C1 C2 -1.5(4) . . . . ? 
Pt1 N3 C1 C2 169.9(2) . . . . ? 
C3 C2 C1 N3 179.0(3) . . . . ? 
C7 C2 C1 N3 -1.5(4) . . . . ? 
C13 C12 C11 C10 0.3(5) . . . . ? 
C9 C10 C11 C12 -0.4(5) . . . . ? 
C11 C10 C9 C8 -0.3(5) . . . . ? 
C13 C8 C9 C10 1.1(4) . . . . ? 
C7 C8 C9 C10 -178.5(3) . . . . ? 
C2 C3 C4 C5 -0.4(5) . . . . ? 
C6 C5 C4 C3 0.4(5) . . . . ? 
 
_diffrn_measured_fraction_theta_max    0.999 
_diffrn_reflns_theta_full              28.74 
_diffrn_measured_fraction_theta_full   0.999 
_refine_diff_density_max    0.919 
_refine_diff_density_min   -0.688 
_refine_diff_density_rms    0.108 

 _iucr_refine_instructions_details
;
TITL 1 in Pbca
CELL 0.71073  12.8700   9.8433  28.9799  90.000  90.000  90.000
ZERR    8.00   0.0012   0.0009   0.0027   0.000   0.000   0.000
LATT  1
SYMM 0.5-X, -Y, 0.5+Z
SYMM -X, 0.5+Y, 0.5-Z
SYMM 0.5+X, 0.5-Y, -Z
SFAC C H N O F S CL PT
UNIT 112 120 24 24 24 8 8 8
TEMP -173
 
L.S. 10
BOND
CONF
SIZE 0.40 0.04 0.03
FMAP 2
PLAN 5
 
ACTA
 
WGHT    0.015900    3.449400
FVAR       0.04507
PT1   8   -0.263839    0.620738    0.658136    11.00000    0.01111    0.01555 =
         0.01366    0.00242   -0.00021    0.00014
CL1   7   -0.387849    0.746871    0.620593    11.00000    0.01807    0.02248 =
         0.01840    0.00354   -0.00317    0.00420
S1S   6   -0.369710    0.298770    0.786153    11.00000    0.01285    0.02132 =
         0.01759    0.00475    0.00094    0.00037
F3S   5   -0.240765    0.353346    0.853466    11.00000    0.02689    0.04264 =
         0.03536   -0.00776   -0.00765   -0.00783
F2S   5   -0.219996    0.156573    0.822819    11.00000    0.03256    0.04145 =
         0.02917    0.00657    0.00145    0.02165
N1    3   -0.350788    0.624561    0.716954    11.00000    0.01567    0.02024 =
         0.01899    0.00292    0.00036    0.00358
AFIX 137
H1A   2   -0.325667    0.689514    0.736314    11.00000   -1.50000
H1B   2   -0.347486    0.542076    0.731058    11.00000   -1.50000
H1C   2   -0.418010    0.643798    0.709734    11.00000   -1.50000
AFIX   0
N3    3   -0.181733    0.620087    0.598533    11.00000    0.01437    0.01756 =
         0.01671    0.00422   -0.00018    0.00147
F1S   5   -0.349169    0.193450    0.868586    11.00000    0.03272    0.03567 =
         0.02012    0.00939    0.00375    0.00228
O3S   4   -0.291870    0.341598    0.752894    11.00000    0.01988    0.02808 =
         0.02355    0.01016    0.00678    0.00085
C7    1   -0.099361    0.636774    0.508184    11.00000    0.01618    0.02308 =
         0.02168    0.00825    0.00191    0.00400
C6    1   -0.063648    0.638746    0.462067    11.00000    0.02352    0.03204 =
         0.02597    0.00897    0.00727    0.00491
AFIX  43
H6    2   -0.017185    0.708059    0.452343    11.00000   -1.20000
AFIX   0
O2S   4   -0.434747    0.406504    0.802815    11.00000    0.01872    0.02632 =
         0.03522    0.00649    0.00571    0.00817
N2    3   -0.154517    0.508009    0.692252    11.00000    0.01601    0.01969 =
         0.01604    0.00220    0.00094    0.00228
AFIX 137
H2A   2   -0.112320    0.466408    0.671391    11.00000   -1.50000
H2B   2   -0.186679    0.444097    0.709881    11.00000   -1.50000
H2C   2   -0.115942    0.563396    0.710654    11.00000   -1.50000
AFIX   0
C1S   1   -0.290788    0.248477    0.835567    11.00000    0.02062    0.02374 =
         0.02156    0.00246    0.00016    0.00221
C8    1   -0.066790    0.732210    0.543135    11.00000    0.01758    0.01845 =
         0.02480    0.00371    0.00408    0.00223
O1S   4   -0.422080    0.174628    0.773403    11.00000    0.02283    0.03206 =
         0.02492   -0.00441    0.00164   -0.00724
C13   1   -0.108294    0.720154    0.588231    11.00000    0.01322    0.01713 =
         0.02594    0.00611    0.00209    0.00178
C3    1   -0.201603    0.435362    0.488852    11.00000    0.02185    0.03396 =
         0.02225   -0.00282   -0.00164   -0.00503
AFIX  43
H3    2   -0.248833    0.366078    0.497844    11.00000   -1.20000
AFIX   0
C5    1   -0.095305    0.541906    0.431319    11.00000    0.02630    0.04069 =
         0.01906    0.00482    0.00370    0.01093
AFIX  43
H5    2   -0.070104    0.544350    0.400519    11.00000   -1.20000
AFIX   0
C2    1   -0.169857    0.533988    0.520872    11.00000    0.01602    0.02539 =
         0.01800    0.00274   -0.00164    0.00187
C12   1   -0.076672    0.808555    0.623219    11.00000    0.01578    0.02026 =
         0.02750    0.00022    0.00141    0.00325
AFIX  43
H12   2   -0.104626    0.799071    0.653387    11.00000   -1.20000
AFIX   0
C1    1   -0.209070    0.532507    0.566751    11.00000    0.01695    0.02121 =
         0.01901    0.00349   -0.00078   -0.00247
AFIX  43
H1    2   -0.257875    0.464091    0.574802    11.00000   -1.20000
AFIX   0
C10   1    0.035255    0.923421    0.569791    11.00000    0.02724    0.02129 =
         0.04926    0.00000    0.00948   -0.00751
AFIX  43
H10   2    0.084165    0.993318    0.563534    11.00000   -1.20000
AFIX   0
C11   1   -0.005098    0.909587    0.614270    11.00000    0.02036    0.02309 =
         0.04523   -0.00355    0.00168   -0.00187
AFIX  43
H11   2    0.016542    0.969242    0.638180    11.00000   -1.20000
AFIX   0
C9    1    0.005184    0.837330    0.534962    11.00000    0.02720    0.02500 =
         0.03847    0.00533    0.01213   -0.00226
AFIX  43
H9    2    0.033342    0.848842    0.504913    11.00000   -1.20000
AFIX   0
C4    1   -0.164267    0.439296    0.444573    11.00000    0.02655    0.04379 =
         0.02111   -0.00472   -0.00411    0.00388
AFIX  43
H4    2   -0.185244    0.372311    0.422890    11.00000   -1.20000
HKLF 4
 
REM  1 in Pbca
REM R1 =  0.0202 for   4052 Fo > 4sig(Fo)  and  0.0284 for all   4763 data
REM    237 parameters refined using      0 restraints
 
END  
     
WGHT      0.0159      3.4495 
REM Highest difference peak  0.919,  deepest hole -0.688,  1-sigma level  0.108
Q1    1  -0.2435  0.7074  0.6599  11.00000  0.05    0.92
Q2    1  -0.2626  0.5646  0.6309  11.00000  0.05    0.87
Q3    1  -0.2526  0.6714  0.6401  11.00000  0.05    0.84
Q4    1  -0.2621  0.5271  0.6510  11.00000  0.05    0.77
Q5    1  -0.2450  0.6714  0.6794  11.00000  0.05    0.73
;

#===END


 
data_5 
 
_audit_creation_method            SHELXL-97 
_chemical_name_systematic 
; 
 ? 
; 
_chemical_name_common             ? 
_chemical_melting_point           ? 
_chemical_formula_moiety          
;
(C20 H24 N8 O Pt), 2(C F3 O3 S), 0.5(C3 H6 O), 0.5(O H2)
; 
_chemical_formula_sum 
 'C23.50 H28 F6 N8 O8 Pt S2' 
_chemical_formula_weight          923.75 
 
loop_ 
 _atom_type_symbol 
 _atom_type_description 
 _atom_type_scat_dispersion_real 
 _atom_type_scat_dispersion_imag 
 _atom_type_scat_source 
 'C'  'C'   0.0033   0.0016 
 'International Tables Vol C Tables 4.2.6.8 and 6.1.1.4' 
 'H'  'H'   0.0000   0.0000 
 'International Tables Vol C Tables 4.2.6.8 and 6.1.1.4' 
 'N'  'N'   0.0061   0.0033 
 'International Tables Vol C Tables 4.2.6.8 and 6.1.1.4' 
 'O'  'O'   0.0106   0.0060 
 'International Tables Vol C Tables 4.2.6.8 and 6.1.1.4' 
 'F'  'F'   0.0171   0.0103 
 'International Tables Vol C Tables 4.2.6.8 and 6.1.1.4' 
 'S'  'S'   0.1246   0.1234 
 'International Tables Vol C Tables 4.2.6.8 and 6.1.1.4' 
 'Pt'  'Pt'  -1.7033   8.3905 
 'International Tables Vol C Tables 4.2.6.8 and 6.1.1.4' 
 
_symmetry_cell_setting            Monoclinic 
_symmetry_space_group_name_H-M    C2/c 
 
loop_ 
 _symmetry_equiv_pos_as_xyz 
 'x, y, z' 
 '-x, y, -z+1/2' 
 'x+1/2, y+1/2, z' 
 '-x+1/2, y+1/2, -z+1/2' 
 '-x, -y, -z' 
 'x, -y, z-1/2' 
 '-x+1/2, -y+1/2, -z' 
 'x+1/2, -y+1/2, z-1/2' 
 
_cell_length_a                    22.1704(19) 
_cell_length_b                    12.2581(10) 
_cell_length_c                    27.389(3) 
_cell_angle_alpha                 90.00 
_cell_angle_beta                  110.7160(10) 
_cell_angle_gamma                 90.00 
_cell_volume                      6962.2(11) 
_cell_formula_units_Z             8 
_cell_measurement_temperature     100(2) 
_cell_measurement_reflns_used     9435 
_cell_measurement_theta_min       2.22 
_cell_measurement_theta_max       28.25 
 
_exptl_crystal_description        block 
_exptl_crystal_colour             colorless 
_exptl_crystal_size_max           0.34 
_exptl_crystal_size_mid           0.28 
_exptl_crystal_size_min           0.22 
_exptl_crystal_density_meas       ? 
_exptl_crystal_density_diffrn     1.763 
_exptl_crystal_density_method     'not measured' 
_exptl_crystal_F_000              3624 
_exptl_absorpt_coefficient_mu     4.237 
_exptl_absorpt_correction_type    multi-scan 
_exptl_absorpt_correction_T_min   0.4659 
_exptl_absorpt_correction_T_max   0.7457 
_exptl_absorpt_process_details    'Blessing, 1995' 
 
_exptl_special_details 
; 
 ? 
; 
 
_diffrn_ambient_temperature       100(2) 
_diffrn_radiation_wavelength      0.71073 
_diffrn_radiation_type            MoK\a 
_diffrn_radiation_source          'fine-focus sealed tube' 
_diffrn_radiation_monochromator   graphite 
_diffrn_measurement_device_type  'CCD area detector'
_diffrn_measurement_method       'phi and omega scans'
_diffrn_detector_area_resol_mean  ? 
_diffrn_reflns_number             63291 
_diffrn_reflns_av_R_equivalents   0.0337 
_diffrn_reflns_av_sigmaI/netI     0.0211 
_diffrn_reflns_limit_h_min        -29 
_diffrn_reflns_limit_h_max        29 
_diffrn_reflns_limit_k_min        -16 
_diffrn_reflns_limit_k_max        16 
_diffrn_reflns_limit_l_min        -36 
_diffrn_reflns_limit_l_max        36 
_diffrn_reflns_theta_min          1.93 
_diffrn_reflns_theta_max          28.27 
_reflns_number_total              8601 
_reflns_number_gt                 7089 
_reflns_threshold_expression      >2sigma(I) 
 
_computing_data_collection      'Bruker SMART'
_computing_cell_refinement      'Bruker SMART'
_computing_data_reduction       'Bruker SAINT'
_computing_structure_solution   'Bruker SHELXTL'
_computing_structure_refinement 'Bruker SHELXTL'
_computing_molecular_graphics   'Bruker SHELXTL'
_computing_publication_material 'Bruker SHELXTL'
 
_refine_special_details 
; 
 Refinement of F^2^ against ALL reflections.  The weighted R-factor wR and 
 goodness of fit S are based on F^2^, conventional R-factors R are based 
 on F, with F set to zero for negative F^2^. The threshold expression of 
 F^2^ > 2sigma(F^2^) is used only for calculating R-factors(gt) etc. and is 
 not relevant to the choice of reflections for refinement.  R-factors based 
 on F^2^ are statistically about twice as large as those based on F, and R- 
 factors based on ALL data will be even larger. 
; 
 
_refine_ls_structure_factor_coef  Fsqd  
_refine_ls_matrix_type            full 
_refine_ls_weighting_scheme       calc  
_refine_ls_weighting_details 
 'calc w=1/[\s^2^(Fo^2^)+(0.0243P)^2^+212.6575P] where P=(Fo^2^+2Fc^2^)/3' 
_atom_sites_solution_primary      direct 
_atom_sites_solution_secondary    difmap 
_atom_sites_solution_hydrogens    geom 
_refine_ls_hydrogen_treatment     mixed 
_refine_ls_extinction_method      none 
_refine_ls_extinction_coef        ? 
_refine_ls_number_reflns          8601 
_refine_ls_number_parameters      574 
_refine_ls_number_restraints      47 
_refine_ls_R_factor_all           0.0814 
_refine_ls_R_factor_gt            0.0619 
_refine_ls_wR_factor_ref          0.1540 
_refine_ls_wR_factor_gt           0.1395 
_refine_ls_goodness_of_fit_ref    1.265 
_refine_ls_restrained_S_all       1.262 
_refine_ls_shift/su_max           0.001 
_refine_ls_shift/su_mean          0.000 
 
loop_ 
 _atom_site_label 
 _atom_site_type_symbol 
 _atom_site_fract_x 
 _atom_site_fract_y 
 _atom_site_fract_z 
 _atom_site_U_iso_or_equiv 
 _atom_site_adp_type 
 _atom_site_occupancy 
 _atom_site_symmetry_multiplicity 
 _atom_site_calc_flag 
 _atom_site_refinement_flags 
 _atom_site_disorder_assembly 
 _atom_site_disorder_group 
Pt1 Pt 0.333214(15) 0.10324(3) 0.178920(12) 0.02991(10) Uani 1 1 d . . . 
N1 N 0.3974(3) 0.1029(6) 0.2536(3) 0.0326(14) Uani 1 1 d . . . 
H1A H 0.4381 0.0949 0.2533 0.049 Uiso 1 1 calc R . . 
H1B H 0.3883 0.0466 0.2715 0.049 Uiso 1 1 calc R . . 
H1C H 0.3946 0.1670 0.2694 0.049 Uiso 1 1 calc R . . 
N2 N 0.3329(3) -0.0637(6) 0.1801(3) 0.0335(15) Uani 1 1 d . . . 
H2A H 0.3739 -0.0885 0.1961 0.050 Uiso 1 1 calc R . . 
H2B H 0.3170 -0.0895 0.1468 0.050 Uiso 1 1 calc R . . 
H2C H 0.3077 -0.0873 0.1980 0.050 Uiso 1 1 calc R . . 
N3 N 0.2685(3) 0.1036(6) 0.1043(2) 0.0289(13) Uani 1 1 d . . . 
C101 C 0.2072(4) 0.1051(7) 0.0977(3) 0.0310(16) Uani 1 1 d . . . 
H101 H 0.1956 0.1053 0.1280 0.037 Uiso 1 1 calc R . . 
C102 C 0.1565(4) 0.1065(9) 0.0482(3) 0.042(2) Uani 1 1 d . . . 
C103 C 0.0919(5) 0.1090(9) 0.0445(4) 0.046(2) Uani 1 1 d . . . 
H103 H 0.0814 0.1095 0.0753 0.056 Uiso 1 1 calc R . . 
C104 C 0.0439(6) 0.1106(14) -0.0035(5) 0.075(4) Uani 1 1 d . . . 
H104 H 0.0001 0.1157 -0.0062 0.090 Uiso 1 1 calc R . . 
C105 C 0.0596(7) 0.105(2) -0.0477(5) 0.117(8) Uani 1 1 d . . . 
H105 H 0.0259 0.1012 -0.0808 0.140 Uiso 1 1 calc R . . 
C106 C 0.1216(8) 0.104(2) -0.0456(5) 0.126(9) Uani 1 1 d . . . 
H106 H 0.1306 0.1024 -0.0770 0.152 Uiso 1 1 calc R . . 
C107 C 0.1730(6) 0.1056(15) 0.0032(4) 0.075(4) Uani 1 1 d . . . 
C108 C 0.2404(6) 0.1067(16) 0.0097(4) 0.081(5) Uani 1 1 d . . . 
C109 C 0.2628(8) 0.112(2) -0.0322(5) 0.125(9) Uani 1 1 d . . . 
H109 H 0.2324 0.1088 -0.0669 0.149 Uiso 1 1 calc R . . 
C110 C 0.3264(9) 0.123(2) -0.0248(6) 0.120(8) Uani 1 1 d . . . 
H110 H 0.3395 0.1337 -0.0540 0.144 Uiso 1 1 calc R . . 
C111 C 0.3730(7) 0.118(2) 0.0258(6) 0.114(8) Uani 1 1 d . . . 
H111 H 0.4176 0.1195 0.0307 0.136 Uiso 1 1 calc R . . 
C112 C 0.3530(6) 0.1108(14) 0.0687(5) 0.073(4) Uani 1 1 d . . . 
H112 H 0.3839 0.1070 0.1030 0.088 Uiso 1 1 calc R . . 
C113 C 0.2874(5) 0.1091(11) 0.0608(4) 0.053(3) Uani 1 1 d . . . 
N41 N 0.3356(4) 0.2654(7) 0.1792(3) 0.0414(18) Uani 1 1 d . . . 
N42 N 0.3094(4) 0.4406(7) 0.1786(3) 0.0431(18) Uani 1 1 d . . . 
N43 N 0.4120(6) 0.5241(7) 0.1817(3) 0.058(3) Uani 1 1 d . . . 
N44 N 0.4894(5) 0.3871(8) 0.1851(3) 0.052(2) Uani 1 1 d . . . 
H44 H 0.5294 0.3750 0.1873 0.063 Uiso 1 1 calc R . . 
N45 N 0.5136(6) 0.5695(10) 0.1817(4) 0.082(4) Uani 1 1 d . . . 
H45A H 0.5033 0.6390 0.1804 0.099 Uiso 1 1 calc R . . 
H45B H 0.5521 0.5501 0.1824 0.099 Uiso 1 1 calc R . . 
O1 O 0.4740(3) 0.2057(7) 0.1858(3) 0.0516(18) Uani 1 1 d . . . 
C201 C 0.2895(5) 0.3375(7) 0.1776(3) 0.0363(19) Uani 1 1 d . . . 
H201 H 0.2475 0.3175 0.1760 0.044 Uiso 1 1 calc R . . 
C202 C 0.2735(7) 0.5404(9) 0.1766(4) 0.058(3) Uani 1 1 d . . . 
H20A H 0.2269 0.5230 0.1629 0.070 Uiso 1 1 calc R . . 
H20B H 0.2820 0.5909 0.1516 0.070 Uiso 1 1 calc R . . 
C203 C 0.2890(8) 0.5987(12) 0.2283(5) 0.083(4) Uani 1 1 d . . . 
H20C H 0.2792 0.5507 0.2532 0.125 Uiso 1 1 calc R . . 
H20D H 0.2628 0.6652 0.2233 0.125 Uiso 1 1 calc R . . 
H20E H 0.3348 0.6181 0.2420 0.125 Uiso 1 1 calc R . . 
C204 C 0.3727(6) 0.4363(9) 0.1813(4) 0.047(2) Uani 1 1 d . . . 
C205 C 0.3885(4) 0.3298(7) 0.1818(3) 0.0330(18) Uani 1 1 d . . . 
C206 C 0.4517(5) 0.2958(10) 0.1844(3) 0.046(2) Uani 1 1 d . . . 
C207 C 0.4705(7) 0.4926(11) 0.1828(4) 0.060(3) Uani 1 1 d . . . 
O12S O 0.4463(7) -0.2056(10) 0.3173(7) 0.133(5) Uani 1 1 d D A . 
S1S S 0.40079(16) -0.1587(2) 0.33692(12) 0.0568(7) Uani 1 1 d . . . 
O11S O 0.3672(5) -0.2322(9) 0.3574(4) 0.102(4) Uani 1 1 d . A . 
O13S O 0.3608(5) -0.0784(7) 0.3045(4) 0.076(3) Uani 1 1 d . A . 
C1S C 0.4399(19) -0.060(3) 0.3907(12) 0.048(9) Uani 0.39(5) 1 d PD A 1 
F11S F 0.478(2) 0.000(3) 0.3758(18) 0.089(14) Uani 0.39(5) 1 d PD A 1 
F12S F 0.4750(16) -0.115(3) 0.4333(10) 0.071(11) Uani 0.39(5) 1 d PD A 1 
F13S F 0.4018(18) 0.001(2) 0.4044(13) 0.083(10) Uani 0.39(5) 1 d PD A 1 
C1SB C 0.4622(15) -0.099(4) 0.3909(11) 0.083(11) Uani 0.61(5) 1 d PD A 2 
F11B F 0.4944(18) -0.023(3) 0.3788(15) 0.117(13) Uani 0.61(5) 1 d PD A 2 
F12B F 0.5030(13) -0.174(4) 0.4196(17) 0.20(2) Uani 0.61(5) 1 d PD A 2 
F13B F 0.435(2) -0.059(5) 0.4214(13) 0.17(2) Uani 0.61(5) 1 d PD A 2 
S2S S 0.6553(6) 0.3729(8) 0.1752(4) 0.039(2) Uani 0.450(17) 1 d PD B 1 
C2S C 0.6527(14) 0.3031(17) 0.1164(10) 0.058(7) Uani 0.450(17) 1 d PD B 1 
O21S O 0.6163(12) 0.308(2) 0.1949(11) 0.070(12) Uani 0.450(17) 1 d PD B 1 
O22S O 0.6291(11) 0.4779(12) 0.1577(8) 0.050(5) Uani 0.450(17) 1 d PD B 1 
O23S O 0.7226(8) 0.3695(16) 0.2068(7) 0.055(5) Uani 0.450(17) 1 d PD B 1 
F21S F 0.5914(9) 0.2941(19) 0.0834(9) 0.078(8) Uani 0.450(17) 1 d PD B 1 
F22S F 0.6848(10) 0.3551(13) 0.0920(6) 0.070(6) Uani 0.450(17) 1 d PD B 1 
F23S F 0.6747(10) 0.2025(12) 0.1251(8) 0.064(5) Uani 0.450(17) 1 d PD B 1 
S2SB S 0.6382(5) 0.3623(10) 0.1616(5) 0.062(3) Uani 0.550(17) 1 d PD B 2 
C2SB C 0.6093(15) 0.264(2) 0.1093(9) 0.078(11) Uani 0.550(17) 1 d PD B 2 
O21B O 0.6266(13) 0.3090(19) 0.2035(8) 0.076(11) Uani 0.550(17) 1 d PD B 2 
O22B O 0.5985(12) 0.4563(15) 0.1425(9) 0.091(8) Uani 0.550(17) 1 d PD B 2 
O23B O 0.7044(9) 0.376(2) 0.1691(13) 0.127(11) Uani 0.550(17) 1 d PD B 2 
F21B F 0.5470(8) 0.2404(14) 0.1001(6) 0.090(6) Uani 0.550(17) 1 d PD B 2 
F22B F 0.6106(16) 0.301(3) 0.0655(8) 0.165(17) Uani 0.550(17) 1 d PD B 2 
F23B F 0.6403(12) 0.1709(18) 0.1215(9) 0.126(10) Uani 0.550(17) 1 d PD B 2 
O5S O 0.5000 -0.0707(14) 0.2500 0.133(8) Uani 1 2 d SD . . 
H5S H 0.483(12) -0.126(9) 0.263(7) 0.200 Uiso 1 1 d D . . 
C41S C 0.3326(13) -0.214(2) 0.0517(10) 0.076(8) Uani 0.50 1 d PDU C -1 
O4S O 0.3119(14) -0.194(3) 0.0807(9) 0.128(10) Uani 0.50 1 d PDU C -1 
C42S C 0.3334(13) -0.166(2) 0.0074(10) 0.074(8) Uani 0.50 1 d PDU C -1 
H42A H 0.3017 -0.2021 -0.0229 0.111 Uiso 0.50 1 calc PR C -1 
H42B H 0.3765 -0.1736 0.0055 0.111 Uiso 0.50 1 calc PR C -1 
H42C H 0.3225 -0.0890 0.0077 0.111 Uiso 0.50 1 calc PR C -1 
C43S C 0.363(2) -0.310(4) 0.0606(14) 0.16(2) Uani 0.50 1 d PDU C -1 
H43A H 0.3798 -0.3250 0.0982 0.241 Uiso 0.50 1 calc PR C -1 
H43B H 0.3994 -0.3071 0.0478 0.241 Uiso 0.50 1 calc PR C -1 
H43C H 0.3334 -0.3679 0.0423 0.241 Uiso 0.50 1 calc PR C -1 
 
loop_ 
 _atom_site_aniso_label 
 _atom_site_aniso_U_11 
 _atom_site_aniso_U_22 
 _atom_site_aniso_U_33 
 _atom_site_aniso_U_23 
 _atom_site_aniso_U_13 
 _atom_site_aniso_U_12 
Pt1 0.02900(16) 0.03309(17) 0.02691(16) -0.00121(13) 0.00898(11) 0.00053(13) 
N1 0.033(3) 0.033(4) 0.029(3) 0.003(3) 0.008(3) 0.005(3) 
N2 0.027(3) 0.033(4) 0.037(4) -0.005(3) 0.008(3) 0.004(3) 
N3 0.031(3) 0.035(3) 0.019(3) -0.005(3) 0.008(2) -0.004(3) 
C101 0.035(4) 0.031(4) 0.026(4) 0.002(3) 0.010(3) -0.004(4) 
C102 0.037(4) 0.056(6) 0.026(4) 0.001(4) 0.004(3) -0.005(4) 
C103 0.040(5) 0.057(6) 0.036(5) 0.002(5) 0.006(4) -0.010(5) 
C104 0.039(6) 0.125(13) 0.046(6) 0.001(8) -0.004(5) -0.003(7) 
C105 0.059(8) 0.24(2) 0.037(7) -0.005(11) -0.007(6) 0.003(12) 
C106 0.073(10) 0.27(3) 0.027(6) -0.004(11) 0.008(6) 0.003(14) 
C107 0.055(7) 0.141(14) 0.026(5) -0.003(7) 0.010(5) 0.000(8) 
C108 0.060(7) 0.159(15) 0.023(5) -0.011(7) 0.015(5) -0.009(9) 
C109 0.077(10) 0.27(3) 0.033(6) -0.008(11) 0.027(7) -0.002(14) 
C110 0.097(12) 0.23(3) 0.052(8) -0.003(12) 0.048(9) -0.010(15) 
C111 0.063(8) 0.23(2) 0.065(9) -0.009(12) 0.043(8) -0.012(12) 
C112 0.049(6) 0.133(13) 0.045(6) -0.011(8) 0.025(5) -0.011(8) 
C113 0.045(5) 0.084(8) 0.032(5) -0.010(5) 0.017(4) -0.009(6) 
N41 0.053(5) 0.041(4) 0.023(3) 0.001(3) 0.004(3) -0.002(4) 
N42 0.050(5) 0.043(4) 0.036(4) 0.007(3) 0.015(4) 0.000(4) 
N43 0.100(8) 0.037(5) 0.036(5) -0.002(4) 0.022(5) -0.017(5) 
N44 0.059(5) 0.059(6) 0.038(4) 0.004(4) 0.015(4) -0.020(5) 
N45 0.110(10) 0.069(7) 0.070(7) 0.004(6) 0.035(7) -0.049(7) 
O1 0.039(4) 0.056(5) 0.056(4) 0.014(4) 0.012(3) -0.004(3) 
C201 0.049(5) 0.034(5) 0.020(4) 0.001(3) 0.005(3) -0.002(4) 
C202 0.091(9) 0.037(6) 0.042(6) 0.004(4) 0.017(6) 0.010(6) 
C203 0.106(11) 0.068(9) 0.064(8) -0.026(7) 0.016(8) 0.014(8) 
C204 0.073(7) 0.043(5) 0.026(4) 0.002(4) 0.019(4) -0.011(5) 
C205 0.047(5) 0.032(4) 0.018(3) -0.001(3) 0.009(3) -0.009(4) 
C206 0.049(5) 0.059(7) 0.025(4) 0.005(4) 0.008(4) -0.017(5) 
C207 0.081(9) 0.067(8) 0.036(5) 0.000(5) 0.025(6) -0.026(7) 
O12S 0.146(12) 0.062(7) 0.211(16) -0.026(9) 0.087(12) 0.012(8) 
S1S 0.0729(19) 0.0353(13) 0.0530(16) 0.0117(12) 0.0111(14) -0.0048(13) 
O11S 0.089(7) 0.085(7) 0.097(8) 0.050(6) -0.012(6) -0.041(6) 
O13S 0.084(6) 0.053(5) 0.079(6) 0.031(5) 0.015(5) 0.010(5) 
C1S 0.05(2) 0.039(16) 0.06(2) 0.011(14) 0.023(18) 0.007(14) 
F11S 0.10(3) 0.061(16) 0.07(2) 0.002(13) -0.007(17) -0.041(17) 
F12S 0.059(18) 0.074(17) 0.052(15) 0.009(11) -0.014(12) 0.003(12) 
F13S 0.10(2) 0.070(17) 0.072(18) -0.030(13) 0.022(15) -0.001(14) 
C1SB 0.049(15) 0.13(3) 0.064(17) 0.02(2) 0.009(13) 0.000(18) 
F11B 0.094(17) 0.14(3) 0.11(2) 0.011(17) 0.038(16) -0.059(17) 
F12B 0.072(14) 0.23(4) 0.21(3) 0.13(3) -0.050(18) -0.01(2) 
F13B 0.19(4) 0.27(6) 0.07(2) -0.06(3) 0.06(3) -0.12(4) 
S2S 0.051(6) 0.033(3) 0.036(4) 0.003(3) 0.021(4) -0.004(4) 
C2S 0.053(15) 0.037(13) 0.065(17) 0.005(12) -0.002(13) -0.001(12) 
O21S 0.044(11) 0.09(2) 0.08(2) 0.070(18) 0.022(12) 0.031(14) 
O22S 0.081(15) 0.032(8) 0.056(12) 0.002(8) 0.049(12) -0.001(9) 
O23S 0.057(11) 0.063(12) 0.042(10) -0.002(9) 0.015(8) -0.018(9) 
F21S 0.052(12) 0.080(15) 0.067(14) -0.023(12) -0.023(11) 0.033(11) 
F22S 0.110(16) 0.051(9) 0.062(10) 0.000(7) 0.045(10) 0.008(9) 
F23S 0.065(12) 0.039(8) 0.067(11) 0.001(7) -0.002(9) 0.015(8) 
S2SB 0.051(4) 0.066(5) 0.058(6) 0.020(4) 0.006(4) -0.016(3) 
C2SB 0.09(2) 0.08(2) 0.056(16) 0.027(14) 0.015(16) 0.059(19) 
O21B 0.11(2) 0.073(18) 0.032(9) 0.005(10) 0.004(10) -0.054(15) 
O22B 0.093(16) 0.060(13) 0.085(15) 0.014(11) -0.012(12) 0.017(12) 
O23B 0.065(13) 0.16(3) 0.16(3) 0.02(2) 0.051(17) -0.031(15) 
F21B 0.080(11) 0.084(11) 0.072(10) -0.020(8) -0.015(8) 0.018(9) 
F22B 0.21(3) 0.23(3) 0.072(14) 0.031(17) 0.072(18) 0.08(3) 
F23B 0.104(18) 0.110(19) 0.132(18) 0.000(15) 0.002(16) 0.058(15) 
O5S 0.20(2) 0.064(10) 0.19(2) 0.000 0.144(19) 0.000 
C41S 0.087(19) 0.09(2) 0.046(14) -0.015(14) 0.013(13) -0.027(16) 
O4S 0.17(2) 0.18(3) 0.073(14) -0.059(16) 0.085(16) -0.03(2) 
C42S 0.077(17) 0.059(15) 0.073(17) -0.037(14) 0.011(14) 0.006(13) 
C43S 0.13(3) 0.25(5) 0.08(2) 0.09(3) 0.00(2) -0.02(4) 
 
_geom_special_details 
; 
 All esds (except the esd in the dihedral angle between two l.s. planes) 
 are estimated using the full covariance matrix.  The cell esds are taken 
 into account individually in the estimation of esds in distances, angles 
 and torsion angles; correlations between esds in cell parameters are only 
 used when they are defined by crystal symmetry.  An approximate (isotropic) 
 treatment of cell esds is used for estimating esds involving l.s. planes. 
; 
 
loop_ 
 _geom_bond_atom_site_label_1 
 _geom_bond_atom_site_label_2 
 _geom_bond_distance 
 _geom_bond_site_symmetry_2 
 _geom_bond_publ_flag 
Pt1 N41 1.988(8) . ? 
Pt1 N1 2.037(7) . ? 
Pt1 N3 2.039(6) . ? 
Pt1 N2 2.047(7) . ? 
N3 C101 1.307(10) . ? 
N3 C113 1.398(11) . ? 
C101 C102 1.422(11) . ? 
C102 C103 1.401(13) . ? 
C102 C107 1.403(14) . ? 
C103 C104 1.368(14) . ? 
C104 C105 1.38(2) . ? 
C105 C106 1.35(2) . ? 
C106 C107 1.418(17) . ? 
C107 C108 1.440(17) . ? 
C108 C109 1.405(16) . ? 
C108 C113 1.420(14) . ? 
C109 C110 1.36(2) . ? 
C110 C111 1.41(2) . ? 
C111 C112 1.398(16) . ? 
C112 C113 1.391(15) . ? 
N41 C201 1.339(12) . ? 
N41 C205 1.396(12) . ? 
N42 C201 1.335(12) . ? 
N42 C204 1.381(14) . ? 
N42 C202 1.450(14) . ? 
N43 C207 1.343(17) . ? 
N43 C204 1.382(13) . ? 
N44 C207 1.354(17) . ? 
N44 C206 1.392(13) . ? 
N45 C207 1.351(15) . ? 
O1 C206 1.207(13) . ? 
C202 C203 1.514(16) . ? 
C204 C205 1.351(14) . ? 
C205 C206 1.438(14) . ? 
O12S S1S 1.421(13) . ? 
S1S O11S 1.406(10) . ? 
S1S O13S 1.409(8) . ? 
S1S C1SB 1.78(3) . ? 
S1S C1S 1.86(3) . ? 
C1S F13S 1.28(4) . ? 
C1S F11S 1.29(2) . ? 
C1S F12S 1.33(3) . ? 
C1SB F13B 1.28(4) . ? 
C1SB F11B 1.29(2) . ? 
C1SB F12B 1.33(3) . ? 
S2S O21S 1.419(15) . ? 
S2S O22S 1.424(14) . ? 
S2S O23S 1.437(16) . ? 
S2S C2S 1.81(2) . ? 
C2S F22S 1.30(3) . ? 
C2S F23S 1.32(2) . ? 
C2S F21S 1.35(3) . ? 
S2SB O23B 1.418(16) . ? 
S2SB O21B 1.421(14) . ? 
S2SB O22B 1.432(15) . ? 
S2SB C2SB 1.80(2) . ? 
C2SB F22B 1.29(3) . ? 
C2SB F23B 1.32(2) . ? 
C2SB F21B 1.34(3) . ? 
C41S O4S 1.08(3) . ? 
C41S C43S 1.33(4) . ? 
C41S C42S 1.35(3) . ? 
 
loop_ 
 _geom_angle_atom_site_label_1 
 _geom_angle_atom_site_label_2 
 _geom_angle_atom_site_label_3 
 _geom_angle 
 _geom_angle_site_symmetry_1 
 _geom_angle_site_symmetry_3 
 _geom_angle_publ_flag 
N41 Pt1 N1 89.4(3) . . ? 
N41 Pt1 N3 90.6(3) . . ? 
N1 Pt1 N3 179.7(3) . . ? 
N41 Pt1 N2 178.6(3) . . ? 
N1 Pt1 N2 89.2(3) . . ? 
N3 Pt1 N2 90.8(3) . . ? 
C101 N3 C113 119.5(7) . . ? 
C101 N3 Pt1 117.9(5) . . ? 
C113 N3 Pt1 122.5(6) . . ? 
N3 C101 C102 124.3(8) . . ? 
C103 C102 C107 121.0(9) . . ? 
C103 C102 C101 120.7(8) . . ? 
C107 C102 C101 118.3(9) . . ? 
C104 C103 C102 119.8(10) . . ? 
C103 C104 C105 119.5(12) . . ? 
C106 C105 C104 122.1(12) . . ? 
C105 C106 C107 120.4(13) . . ? 
C102 C107 C106 117.1(11) . . ? 
C102 C107 C108 118.2(9) . . ? 
C106 C107 C108 124.7(11) . . ? 
C109 C108 C113 117.1(12) . . ? 
C109 C108 C107 123.4(11) . . ? 
C113 C108 C107 119.3(9) . . ? 
C110 C109 C108 122.1(13) . . ? 
C109 C110 C111 120.3(13) . . ? 
C112 C111 C110 119.4(13) . . ? 
C113 C112 C111 119.7(12) . . ? 
C112 C113 N3 118.7(9) . . ? 
C112 C113 C108 121.0(10) . . ? 
N3 C113 C108 120.1(9) . . ? 
C201 N41 C205 104.3(8) . . ? 
C201 N41 Pt1 129.9(7) . . ? 
C205 N41 Pt1 125.9(7) . . ? 
C201 N42 C204 106.7(8) . . ? 
C201 N42 C202 128.7(9) . . ? 
C204 N42 C202 124.6(9) . . ? 
C207 N43 C204 112.2(10) . . ? 
C207 N44 C206 126.3(11) . . ? 
N42 C201 N41 112.4(9) . . ? 
N42 C202 C203 115.1(10) . . ? 
C205 C204 N42 107.0(9) . . ? 
C205 C204 N43 126.3(11) . . ? 
N42 C204 N43 126.6(10) . . ? 
C204 C205 N41 109.6(9) . . ? 
C204 C205 C206 121.6(9) . . ? 
N41 C205 C206 128.8(9) . . ? 
O1 C206 N44 119.9(10) . . ? 
O1 C206 C205 130.4(9) . . ? 
N44 C206 C205 109.7(10) . . ? 
N43 C207 N45 119.0(13) . . ? 
N43 C207 N44 123.7(10) . . ? 
N45 C207 N44 117.2(13) . . ? 
O11S S1S O13S 113.3(6) . . ? 
O11S S1S O12S 116.0(8) . . ? 
O13S S1S O12S 114.6(8) . . ? 
O11S S1S C1SB 106.8(10) . . ? 
O13S S1S C1SB 111.2(14) . . ? 
O12S S1S C1SB 92.6(17) . . ? 
O11S S1S C1S 105.2(10) . . ? 
O13S S1S C1S 93.4(12) . . ? 
O12S S1S C1S 111.5(13) . . ? 
C1SB S1S C1S 21.4(9) . . ? 
F13S C1S F11S 109(3) . . ? 
F13S C1S F12S 106(2) . . ? 
F11S C1S F12S 109(3) . . ? 
F13S C1S S1S 116(3) . . ? 
F11S C1S S1S 107(3) . . ? 
F12S C1S S1S 109(2) . . ? 
F13B C1SB F11B 109(3) . . ? 
F13B C1SB F12B 105(2) . . ? 
F11B C1SB F12B 109(3) . . ? 
F13B C1SB S1S 108(2) . . ? 
F11B C1SB S1S 115(2) . . ? 
F12B C1SB S1S 111(3) . . ? 
O21S S2S O22S 114.1(12) . . ? 
O21S S2S O23S 113.4(14) . . ? 
O22S S2S O23S 116.3(13) . . ? 
O21S S2S C2S 103.9(15) . . ? 
O22S S2S C2S 104.3(11) . . ? 
O23S S2S C2S 102.8(12) . . ? 
F22S C2S F23S 108(2) . . ? 
F22S C2S F21S 108(2) . . ? 
F23S C2S F21S 105(2) . . ? 
F22S C2S S2S 112.1(17) . . ? 
F23S C2S S2S 112.9(17) . . ? 
F21S C2S S2S 110.1(19) . . ? 
O23B S2SB O21B 114.4(16) . . ? 
O23B S2SB O22B 115.2(16) . . ? 
O21B S2SB O22B 113.7(15) . . ? 
O23B S2SB C2SB 104.8(15) . . ? 
O21B S2SB C2SB 102.7(13) . . ? 
O22B S2SB C2SB 104.2(11) . . ? 
F22B C2SB F23B 111(2) . . ? 
F22B C2SB F21B 105(2) . . ? 
F23B C2SB F21B 106(2) . . ? 
F22B C2SB S2SB 113(2) . . ? 
F23B C2SB S2SB 111.7(18) . . ? 
F21B C2SB S2SB 110.3(16) . . ? 
O4S C41S C43S 113(4) . . ? 
O4S C41S C42S 135(4) . . ? 
C43S C41S C42S 112(3) . . ? 
 
loop_ 
 _geom_torsion_atom_site_label_1 
 _geom_torsion_atom_site_label_2 
 _geom_torsion_atom_site_label_3 
 _geom_torsion_atom_site_label_4 
 _geom_torsion 
 _geom_torsion_site_symmetry_1 
 _geom_torsion_site_symmetry_2 
 _geom_torsion_site_symmetry_3 
 _geom_torsion_site_symmetry_4 
 _geom_torsion_publ_flag 
N41 Pt1 N3 C101 -90.4(7) . . . . ? 
N1 Pt1 N3 C101 2(53) . . . . ? 
N2 Pt1 N3 C101 90.1(7) . . . . ? 
N41 Pt1 N3 C113 85.5(9) . . . . ? 
N1 Pt1 N3 C113 178(100) . . . . ? 
N2 Pt1 N3 C113 -94.0(9) . . . . ? 
C113 N3 C101 C102 3.4(15) . . . . ? 
Pt1 N3 C101 C102 179.4(7) . . . . ? 
N3 C101 C102 C103 -179.5(10) . . . . ? 
N3 C101 C102 C107 0.4(17) . . . . ? 
C107 C102 C103 C104 0(2) . . . . ? 
C101 C102 C103 C104 179.8(12) . . . . ? 
C102 C103 C104 C105 3(2) . . . . ? 
C103 C104 C105 C106 -4(3) . . . . ? 
C104 C105 C106 C107 2(4) . . . . ? 
C103 C102 C107 C106 -2(2) . . . . ? 
C101 C102 C107 C106 178.3(16) . . . . ? 
C103 C102 C107 C108 178.0(14) . . . . ? 
C101 C102 C107 C108 -2(2) . . . . ? 
C105 C106 C107 C102 1(3) . . . . ? 
C105 C106 C107 C108 -179(2) . . . . ? 
C102 C107 C108 C109 -176.1(19) . . . . ? 
C106 C107 C108 C109 4(3) . . . . ? 
C102 C107 C108 C113 0(3) . . . . ? 
C106 C107 C108 C113 179.5(19) . . . . ? 
C113 C108 C109 C110 -2(3) . . . . ? 
C107 C108 C109 C110 174(2) . . . . ? 
C108 C109 C110 C111 6(4) . . . . ? 
C109 C110 C111 C112 -5(4) . . . . ? 
C110 C111 C112 C113 0(3) . . . . ? 
C111 C112 C113 N3 -179.0(16) . . . . ? 
C111 C112 C113 C108 5(3) . . . . ? 
C101 N3 C113 C112 178.1(12) . . . . ? 
Pt1 N3 C113 C112 2.2(17) . . . . ? 
C101 N3 C113 C108 -5.6(18) . . . . ? 
Pt1 N3 C113 C108 178.6(11) . . . . ? 
C109 C108 C113 C112 -4(3) . . . . ? 
C107 C108 C113 C112 -179.7(16) . . . . ? 
C109 C108 C113 N3 -179.9(17) . . . . ? 
C107 C108 C113 N3 4(2) . . . . ? 
N1 Pt1 N41 C201 -112.5(8) . . . . ? 
N3 Pt1 N41 C201 67.2(8) . . . . ? 
N2 Pt1 N41 C201 -132(13) . . . . ? 
N1 Pt1 N41 C205 66.6(7) . . . . ? 
N3 Pt1 N41 C205 -113.7(7) . . . . ? 
N2 Pt1 N41 C205 47(13) . . . . ? 
C204 N42 C201 N41 -0.5(10) . . . . ? 
C202 N42 C201 N41 178.9(9) . . . . ? 
C205 N41 C201 N42 0.6(10) . . . . ? 
Pt1 N41 C201 N42 179.9(6) . . . . ? 
C201 N42 C202 C203 103.4(14) . . . . ? 
C204 N42 C202 C203 -77.3(15) . . . . ? 
C201 N42 C204 C205 0.1(10) . . . . ? 
C202 N42 C204 C205 -179.3(9) . . . . ? 
C201 N42 C204 N43 178.1(9) . . . . ? 
C202 N42 C204 N43 -1.3(15) . . . . ? 
C207 N43 C204 C205 -0.1(14) . . . . ? 
C207 N43 C204 N42 -177.8(9) . . . . ? 
N42 C204 C205 N41 0.2(10) . . . . ? 
N43 C204 C205 N41 -177.8(9) . . . . ? 
N42 C204 C205 C206 179.9(8) . . . . ? 
N43 C204 C205 C206 1.9(15) . . . . ? 
C201 N41 C205 C204 -0.5(9) . . . . ? 
Pt1 N41 C205 C204 -179.8(6) . . . . ? 
C201 N41 C205 C206 179.9(8) . . . . ? 
Pt1 N41 C205 C206 0.5(12) . . . . ? 
C207 N44 C206 O1 178.6(10) . . . . ? 
C207 N44 C206 C205 -1.2(13) . . . . ? 
C204 C205 C206 O1 179.1(10) . . . . ? 
N41 C205 C206 O1 -1.3(16) . . . . ? 
C204 C205 C206 N44 -1.1(12) . . . . ? 
N41 C205 C206 N44 178.5(8) . . . . ? 
C204 N43 C207 N45 178.1(10) . . . . ? 
C204 N43 C207 N44 -2.3(15) . . . . ? 
C206 N44 C207 N43 3.1(17) . . . . ? 
C206 N44 C207 N45 -177.2(10) . . . . ? 
O11S S1S C1S F13S -66(2) . . . . ? 
O13S S1S C1S F13S 49(2) . . . . ? 
O12S S1S C1S F13S 167(2) . . . . ? 
C1SB S1S C1S F13S -164(5) . . . . ? 
O11S S1S C1S F11S 172(3) . . . . ? 
O13S S1S C1S F11S -73(3) . . . . ? 
O12S S1S C1S F11S 46(3) . . . . ? 
C1SB S1S C1S F11S 75(4) . . . . ? 
O11S S1S C1S F12S 54(3) . . . . ? 
O13S S1S C1S F12S 170(2) . . . . ? 
O12S S1S C1S F12S -72(2) . . . . ? 
C1SB S1S C1S F12S -43(4) . . . . ? 
O11S S1S C1SB F13B -54(3) . . . . ? 
O13S S1S C1SB F13B 70(3) . . . . ? 
O12S S1S C1SB F13B -172(3) . . . . ? 
C1S S1S C1SB F13B 35(4) . . . . ? 
O11S S1S C1SB F11B -175(3) . . . . ? 
O13S S1S C1SB F11B -51(3) . . . . ? 
O12S S1S C1SB F11B 67(3) . . . . ? 
C1S S1S C1SB F11B -86(4) . . . . ? 
O11S S1S C1SB F12B 60(3) . . . . ? 
O13S S1S C1SB F12B -175(3) . . . . ? 
O12S S1S C1SB F12B -58(3) . . . . ? 
C1S S1S C1SB F12B 149(5) . . . . ? 
O21S S2S C2S F22S 177.8(19) . . . . ? 
O22S S2S C2S F22S 58(2) . . . . ? 
O23S S2S C2S F22S -64(2) . . . . ? 
O21S S2S C2S F23S -59(2) . . . . ? 
O22S S2S C2S F23S -179(2) . . . . ? 
O23S S2S C2S F23S 59(2) . . . . ? 
O21S S2S C2S F21S 58(2) . . . . ? 
O22S S2S C2S F21S -62(2) . . . . ? 
O23S S2S C2S F21S 176.6(18) . . . . ? 
O23B S2SB C2SB F22B -66(2) . . . . ? 
O21B S2SB C2SB F22B 175(2) . . . . ? 
O22B S2SB C2SB F22B 56(3) . . . . ? 
O23B S2SB C2SB F23B 60(3) . . . . ? 
O21B S2SB C2SB F23B -60(3) . . . . ? 
O22B S2SB C2SB F23B -178(2) . . . . ? 
O23B S2SB C2SB F21B 177.3(18) . . . . ? 
O21B S2SB C2SB F21B 57(2) . . . . ? 
O22B S2SB C2SB F21B -61(2) . . . . ? 
 
_diffrn_measured_fraction_theta_max    0.998 
_diffrn_reflns_theta_full              28.27 
_diffrn_measured_fraction_theta_full   0.998 
_refine_diff_density_max    5.290 
_refine_diff_density_min   -4.907 
_refine_diff_density_rms    0.202 

_iucr_refine_instructions_details
;
TITL 5 in C2/c
CELL 0.71073  22.1704  12.2581  27.3890  90.000 110.716  90.000
ZERR    8.00   0.0019   0.0010   0.0031   0.000   0.001   0.000
LATT  7
SYMM -X, Y, 0.5-Z
SFAC C H N O F S PT
UNIT 188 224 64 64 48 16 8
TEMP -173
 
L.S. 10
BOND
CONF
FMAP 2
PLAN 10
 
ACTA
 
DFIX 0.91 0.02 O5S H5S
DFIX 2.11 0.04 O12s H5S
 
CHIV 0 0.1 C41s
SADI C41S C42s C41S C43s
SIMU C41s C42s C43S O4S
 
WGHT    0.024300  212.657516
FVAR       0.02854   0.39060   0.44980
PT1   7    0.333214    0.103240    0.178920    11.00000    0.02900    0.03309 =
         0.02691   -0.00121    0.00898    0.00053
N1    3    0.397449    0.102866    0.253600    11.00000    0.03331    0.03262 =
         0.02921    0.00321    0.00768    0.00456
AFIX 137
H1A   2    0.438110    0.094880    0.253270    11.00000   -1.50000
H1B   2    0.388339    0.046551    0.271513    11.00000   -1.50000
H1C   2    0.394587    0.166998    0.269375    11.00000   -1.50000
AFIX   0
N2    3    0.332897   -0.063708    0.180134    11.00000    0.02742    0.03280 =
         0.03727   -0.00519    0.00779    0.00353
AFIX 137
H2A   2    0.373870   -0.088513    0.196144    11.00000   -1.50000
H2B   2    0.317012   -0.089493    0.146844    11.00000   -1.50000
H2C   2    0.307669   -0.087343    0.197953    11.00000   -1.50000
AFIX   0
N3    3    0.268515    0.103601    0.104335    11.00000    0.03140    0.03523 =
         0.01904   -0.00512    0.00780   -0.00427
C101  1    0.207153    0.105128    0.097715    11.00000    0.03538    0.03112 =
         0.02599    0.00199    0.01022   -0.00370
AFIX  43
H101  2    0.195627    0.105308    0.127984    11.00000   -1.20000
AFIX   0
C102  1    0.156521    0.106537    0.048200    11.00000    0.03705    0.05562 =
         0.02617    0.00143    0.00353   -0.00483
C103  1    0.091903    0.108999    0.044545    11.00000    0.03983    0.05739 =
         0.03570    0.00171    0.00587   -0.00992
AFIX  43
H103  2    0.081428    0.109546    0.075312    11.00000   -1.20000
AFIX   0
C104  1    0.043919    0.110614   -0.003464    11.00000    0.03902    0.12534 =
         0.04614    0.00092   -0.00381   -0.00272
AFIX  43
H104  2    0.000071    0.115731   -0.006239    11.00000   -1.20000
AFIX   0
C105  1    0.059626    0.104774   -0.047697    11.00000    0.05853    0.23512 =
         0.03663   -0.00548   -0.00716    0.00279
AFIX  43
H105  2    0.025925    0.101161   -0.080787    11.00000   -1.20000
AFIX   0
C106  1    0.121552    0.104010   -0.045593    11.00000    0.07330    0.27088 =
         0.02726   -0.00355    0.00793    0.00280
AFIX  43
H106  2    0.130588    0.102413   -0.077002    11.00000   -1.20000
AFIX   0
C107  1    0.173026    0.105581    0.003245    11.00000    0.05492    0.14131 =
         0.02554   -0.00275    0.01023   -0.00002
C108  1    0.240382    0.106664    0.009702    11.00000    0.06036    0.15921 =
         0.02345   -0.01075    0.01528   -0.00874
C109  1    0.262770    0.112402   -0.032222    11.00000    0.07681    0.26941 =
         0.03328   -0.00775    0.02670   -0.00207
AFIX  43
H109  2    0.232445    0.108801   -0.066853    11.00000   -1.20000
AFIX   0
C110  1    0.326435    0.122944   -0.024829    11.00000    0.09653    0.22815 =
         0.05241   -0.00340    0.04785   -0.00994
AFIX  43
H110  2    0.339532    0.133717   -0.053965    11.00000   -1.20000
AFIX   0
C111  1    0.372990    0.117968    0.025765    11.00000    0.06257    0.22909 =
         0.06530   -0.00866    0.04290   -0.01178
AFIX  43
H111  2    0.417621    0.119473    0.030749    11.00000   -1.20000
AFIX   0
C112  1    0.352952    0.110785    0.068659    11.00000    0.04883    0.13318 =
         0.04474   -0.01148    0.02456   -0.01114
AFIX  43
H112  2    0.383945    0.107045    0.103022    11.00000   -1.20000
AFIX   0
C113  1    0.287442    0.109137    0.060814    11.00000    0.04488    0.08435 =
         0.03185   -0.01048    0.01673   -0.00858
N41   3    0.335562    0.265404    0.179194    11.00000    0.05347    0.04051 =
         0.02284    0.00055    0.00420   -0.00239
N42   3    0.309376    0.440565    0.178557    11.00000    0.05017    0.04280 =
         0.03619    0.00666    0.01498   -0.00047
N43   3    0.411979    0.524071    0.181676    11.00000    0.09995    0.03734 =
         0.03574   -0.00220    0.02174   -0.01689
N44   3    0.489371    0.387082    0.185131    11.00000    0.05853    0.05886 =
         0.03793    0.00411    0.01549   -0.01978
AFIX  43
H44   2    0.529385    0.375023    0.187349    11.00000   -1.20000
AFIX   0
N45   3    0.513645    0.569501    0.181738    11.00000    0.11029    0.06871 =
         0.07011    0.00447    0.03463   -0.04895
AFIX  93
H45A  2    0.503278    0.639021    0.180385    11.00000   -1.20000
H45B  2    0.552148    0.550065    0.182428    11.00000   -1.20000
AFIX   0
O1    4    0.474037    0.205660    0.185781    11.00000    0.03949    0.05563 =
         0.05610    0.01392    0.01245   -0.00398
C201  1    0.289537    0.337481    0.177628    11.00000    0.04947    0.03353 =
         0.01997    0.00131    0.00508   -0.00242
AFIX  43
H201  2    0.247478    0.317517    0.176035    11.00000   -1.20000
AFIX   0
C202  1    0.273493    0.540401    0.176620    11.00000    0.09132    0.03651 =
         0.04200    0.00399    0.01732    0.01037
AFIX  23
H20A  2    0.226882    0.522954    0.162926    11.00000   -1.20000
H20B  2    0.281951    0.590906    0.151572    11.00000   -1.20000
AFIX   0
C203  1    0.288954    0.598749    0.228325    11.00000    0.10650    0.06793 =
         0.06394   -0.02558    0.01638    0.01434
AFIX 137
H20C  2    0.279233    0.550713    0.253180    11.00000   -1.50000
H20D  2    0.262845    0.665167    0.223266    11.00000   -1.50000
H20E  2    0.334796    0.618142    0.242004    11.00000   -1.50000
AFIX   0
C204  1    0.372721    0.436286    0.181293    11.00000    0.07288    0.04328 =
         0.02597    0.00167    0.01918   -0.01097
C205  1    0.388536    0.329765    0.181806    11.00000    0.04731    0.03178 =
         0.01773   -0.00113    0.00877   -0.00929
C206  1    0.451694    0.295849    0.184404    11.00000    0.04922    0.05896 =
         0.02494    0.00468    0.00837   -0.01741
C207  1    0.470453    0.492613    0.182758    11.00000    0.08129    0.06692 =
         0.03615   -0.00002    0.02540   -0.02585
O12S  4    0.446263   -0.205561    0.317270    11.00000    0.14580    0.06197 =
         0.21073   -0.02579    0.08724    0.01241
S1S   6    0.400792   -0.158661    0.336917    11.00000    0.07293    0.03531 =
         0.05305    0.01175    0.01109   -0.00475
O11S  4    0.367244   -0.232180    0.357414    11.00000    0.08873    0.08467 =
         0.09712    0.04974   -0.01201   -0.04134
O13S  4    0.360822   -0.078378    0.304509    11.00000    0.08399    0.05345 =
         0.07897    0.03148    0.01518    0.00954
PART   1
C1S   1    0.439873   -0.060442    0.390718    21.00000    0.05156    0.03875 =
         0.05692    0.01067    0.02325    0.00709
F11S  5    0.477600   -0.000022    0.375800    21.00000    0.10301    0.06088 =
         0.07197    0.00224   -0.00650   -0.04083
F12S  5    0.474976   -0.115266    0.433301    21.00000    0.05858    0.07449 =
         0.05226    0.00885   -0.01447    0.00291
F13S  5    0.401811    0.000967    0.404351    21.00000    0.10181    0.06950 =
         0.07209   -0.03007    0.02222   -0.00087
PART   2
SAME c1s > f13s
C1SB  1    0.462181   -0.098857    0.390938   -21.00000    0.04930    0.12789 =
         0.06354    0.02210    0.00873    0.00029
F11B  5    0.494408   -0.023111    0.378781   -21.00000    0.09434    0.14483 =
         0.11296    0.01104    0.03809   -0.05911
F12B  5    0.502950   -0.173986    0.419641   -21.00000    0.07166    0.23315 =
         0.21167    0.13472   -0.05041   -0.00614
F13B  5    0.435465   -0.059307    0.421421   -21.00000    0.18950    0.26516 =
         0.07472   -0.06388    0.06202   -0.12232
PART   1
S2S   6    0.655266    0.372948    0.175218    31.00000    0.05139    0.03289 =
         0.03574    0.00276    0.02069   -0.00393
C2S   1    0.652707    0.303144    0.116421    31.00000    0.05278    0.03708 =
         0.06455    0.00488   -0.00200   -0.00119
O21S  4    0.616254    0.307528    0.194922    31.00000    0.04393    0.08798 =
         0.07929    0.07023    0.02175    0.03071
O22S  4    0.629051    0.477939    0.157664    31.00000    0.08111    0.03167 =
         0.05647    0.00230    0.04923   -0.00139
O23S  4    0.722621    0.369460    0.206810    31.00000    0.05710    0.06326 =
         0.04206   -0.00168    0.01473   -0.01836
F21S  5    0.591355    0.294141    0.083434    31.00000    0.05182    0.07960 =
         0.06659   -0.02285   -0.02255    0.03264
F22S  5    0.684799    0.355055    0.091986    31.00000    0.10950    0.05085 =
         0.06175   -0.00035    0.04457    0.00806
F23S  5    0.674689    0.202543    0.125096    31.00000    0.06501    0.03919 =
         0.06744    0.00052   -0.00151    0.01475
PART   2
SAME s2s > f23s
S2SB  6    0.638207    0.362326    0.161610   -31.00000    0.05111    0.06612 =
         0.05825    0.02001    0.00608   -0.01569
C2SB  1    0.609260    0.264296    0.109328   -31.00000    0.09142    0.07725 =
         0.05613    0.02686    0.01541    0.05926
O21B  4    0.626575    0.309038    0.203520   -31.00000    0.10656    0.07272 =
         0.03180    0.00494    0.00382   -0.05428
O22B  4    0.598480    0.456317    0.142494   -31.00000    0.09280    0.06042 =
         0.08525    0.01449   -0.01185    0.01668
O23B  4    0.704357    0.376452    0.169097   -31.00000    0.06535    0.16258 =
         0.16188    0.01844    0.05066   -0.03141
F21B  5    0.547049    0.240443    0.100125   -31.00000    0.08012    0.08385 =
         0.07159   -0.02000   -0.01541    0.01782
F22B  5    0.610600    0.301475    0.065520   -31.00000    0.21173    0.22805 =
         0.07238    0.03113    0.07187    0.08065
F23B  5    0.640310    0.170869    0.121525   -31.00000    0.10443    0.11000 =
         0.13184    0.00048    0.00240    0.05788
PART   0
O5S   4    0.500000   -0.070677    0.250000    10.50000    0.20433    0.06424 =
         0.19089    0.00000    0.14409    0.00000
H5S   2    0.482723   -0.126356    0.263491    11.00000   -1.50000
Part -1
C41S  1    0.332557   -0.214347    0.051700    10.50000    0.08713    0.08729 =
         0.04617   -0.01456    0.01298   -0.02663
O4S   4    0.311915   -0.193828    0.080739    10.50000    0.16586    0.18007 =
         0.07264   -0.05886    0.08508   -0.02541
C42S  1    0.333386   -0.166443    0.007443    10.50000    0.07731    0.05912 =
         0.07284   -0.03666    0.01129    0.00582
AFIX 137
H42A  2    0.301741   -0.202066   -0.022879    10.50000   -1.50000
H42B  2    0.376492   -0.173566    0.005470    10.50000   -1.50000
H42C  2    0.322526   -0.088996    0.007679    10.50000   -1.50000
AFIX   0
C43S  1    0.363355   -0.309915    0.060586    10.50000    0.13061    0.24599 =
         0.07685    0.09463    0.00142   -0.02146
AFIX 137
H43A  2    0.379814   -0.324970    0.098156    10.50000   -1.50000
H43B  2    0.399422   -0.307084    0.047828    10.50000   -1.50000
H43C  2    0.333449   -0.367883    0.042302    10.50000   -1.50000
 
HKLF 4
 
REM  5 in C2/c
REM R1 =  0.0619 for   7089 Fo > 4sig(Fo)  and  0.0814 for all   8601 data
REM    574 parameters refined using     47 restraints
 
END  
     
WGHT      0.0243    212.3175 
REM Highest difference peak  5.290,  deepest hole -4.907,  1-sigma level  0.202
Q1    1  -0.0007  0.1040  0.0370  11.00000  0.05    5.29
Q2    1   0.3323  0.5124  0.1782  11.00000  0.05    2.65
Q3    1   0.4220 -0.2460  0.2148  11.00000  0.05    2.59
Q4    1   0.2990  0.0711  0.1777  11.00000  0.05    2.20
Q5    1   0.3979 -0.1857  0.1313  11.00000  0.05    1.83
Q6    1   0.3386 -0.2516  0.1858  11.00000  0.05    1.80
Q7    1   0.3587  0.0572  0.1850  11.00000  0.05    1.73
Q8    1   0.3563  0.7193  0.1992  11.00000  0.05    1.39
Q9    1   0.3320 -0.1012  0.2509  11.00000  0.05    1.37
Q10   1   0.3637 -0.2228  0.0894  11.00000  0.05    1.34

;


#===END


 
data_7 
 
_audit_creation_method            SHELXL-97 
_chemical_name_systematic 
; 
 ? 
; 
_chemical_name_common             ? 
_chemical_melting_point           ? 
_chemical_formula_moiety          'C5 H11 Cl N3 Pt, C F3 O3 S' 
_chemical_formula_sum 
 'C6 H11 Cl F3 N3 O3 Pt S' 
_chemical_formula_weight          492.78 
 
loop_ 
 _atom_type_symbol 
 _atom_type_description 
 _atom_type_scat_dispersion_real 
 _atom_type_scat_dispersion_imag 
 _atom_type_scat_source 
 'C'  'C'   0.0033   0.0016 
 'International Tables Vol C Tables 4.2.6.8 and 6.1.1.4' 
 'H'  'H'   0.0000   0.0000 
 'International Tables Vol C Tables 4.2.6.8 and 6.1.1.4' 
 'N'  'N'   0.0061   0.0033 
 'International Tables Vol C Tables 4.2.6.8 and 6.1.1.4' 
 'O'  'O'   0.0106   0.0060 
 'International Tables Vol C Tables 4.2.6.8 and 6.1.1.4' 
 'F'  'F'   0.0171   0.0103 
 'International Tables Vol C Tables 4.2.6.8 and 6.1.1.4' 
 'S'  'S'   0.1246   0.1234 
 'International Tables Vol C Tables 4.2.6.8 and 6.1.1.4' 
 'Cl'  'Cl'   0.1484   0.1585 
 'International Tables Vol C Tables 4.2.6.8 and 6.1.1.4' 
 'Pt'  'Pt'  -1.7033   8.3905 
 'International Tables Vol C Tables 4.2.6.8 and 6.1.1.4' 
 
_symmetry_cell_setting            Monoclinic 
_symmetry_space_group_name_H-M    P2(1)/c 
 
loop_ 
 _symmetry_equiv_pos_as_xyz 
 'x, y, z' 
 '-x, y+1/2, -z+1/2' 
 '-x, -y, -z' 
 'x, -y-1/2, z-1/2' 
 
_cell_length_a                    11.8226(7) 
_cell_length_b                    4.9998(3) 
_cell_length_c                    23.0652(13) 
_cell_angle_alpha                 90.00 
_cell_angle_beta                  101.8880(10) 
_cell_angle_gamma                 90.00 
_cell_volume                      1334.16(14) 
_cell_formula_units_Z             4 
_cell_measurement_temperature     100(2) 
_cell_measurement_reflns_used     9918 
_cell_measurement_theta_min       2.25 
_cell_measurement_theta_max       28.61 
 
_exptl_crystal_description        rod
_exptl_crystal_colour             colourless
_exptl_crystal_size_max           0.32 
_exptl_crystal_size_mid           0.09 
_exptl_crystal_size_min           0.07 
_exptl_crystal_density_meas       ? 
_exptl_crystal_density_diffrn     2.453 
_exptl_crystal_density_method     'not measured' 
_exptl_crystal_F_000              920 
_exptl_absorpt_coefficient_mu     10.912 
_exptl_absorpt_correction_type    multi-scan 
_exptl_absorpt_correction_T_min   0.1280 
_exptl_absorpt_correction_T_max   0.5155 
_exptl_absorpt_process_details    'Blessing, 1995' 
 
_exptl_special_details 
; 
 ? 
; 
 
_diffrn_ambient_temperature       100(2) 
_diffrn_radiation_wavelength      0.71073 
_diffrn_radiation_type            MoK\a 
_diffrn_radiation_source          'fine-focus sealed tube' 
_diffrn_radiation_monochromator   graphite 
_diffrn_measurement_device_type  'CCD area detector'
_diffrn_measurement_method       'phi and omega scans'
_diffrn_detector_area_resol_mean  ? 
_diffrn_standards_number          ? 
_diffrn_standards_interval_count  ? 
_diffrn_standards_interval_time   ? 
_diffrn_standards_decay_%         ? 
_diffrn_reflns_number             50604 
_diffrn_reflns_av_R_equivalents   0.0223 
_diffrn_reflns_av_sigmaI/netI     0.0088 
_diffrn_reflns_limit_h_min        -15 
_diffrn_reflns_limit_h_max        15 
_diffrn_reflns_limit_k_min        -6 
_diffrn_reflns_limit_k_max        6 
_diffrn_reflns_limit_l_min        -31 
_diffrn_reflns_limit_l_max        29 
_diffrn_reflns_theta_min          1.76 
_diffrn_reflns_theta_max          28.61 
_reflns_number_total              3420 
_reflns_number_gt                 3286 
_reflns_threshold_expression      >2sigma(I) 
 
_computing_data_collection      'Bruker SMART'
_computing_cell_refinement      'Bruker SMART'
_computing_data_reduction       'Bruker SAINT'
_computing_structure_solution   'Bruker SHELXTL'
_computing_structure_refinement 'Bruker SHELXTL'
_computing_molecular_graphics   'Bruker SHELXTL'
_computing_publication_material 'Bruker SHELXTL'
 
_refine_special_details 
; 
 Refinement of F^2^ against ALL reflections.  The weighted R-factor wR and 
 goodness of fit S are based on F^2^, conventional R-factors R are based 
 on F, with F set to zero for negative F^2^. The threshold expression of 
 F^2^ > 2sigma(F^2^) is used only for calculating R-factors(gt) etc. and is 
 not relevant to the choice of reflections for refinement.  R-factors based 
 on F^2^ are statistically about twice as large as those based on F, and R- 
 factors based on ALL data will be even larger. 
; 
 
_refine_ls_structure_factor_coef  Fsqd  
_refine_ls_matrix_type            full 
_refine_ls_weighting_scheme       calc  
_refine_ls_weighting_details 
 'calc w=1/[\s^2^(Fo^2^)+(0.0188P)^2^+1.6715P] where P=(Fo^2^+2Fc^2^)/3' 
_atom_sites_solution_primary      heavy
_atom_sites_solution_secondary    difmap 
_atom_sites_solution_hydrogens    geom 
_refine_ls_hydrogen_treatment     constr
_refine_ls_extinction_method      none 
_refine_ls_extinction_coef        ? 
_refine_ls_number_reflns          3420 
_refine_ls_number_parameters      165 
_refine_ls_number_restraints      0 
_refine_ls_R_factor_all           0.0155 
_refine_ls_R_factor_gt            0.0143 
_refine_ls_wR_factor_ref          0.0377 
_refine_ls_wR_factor_gt           0.0365 
_refine_ls_goodness_of_fit_ref    1.158 
_refine_ls_restrained_S_all       1.158 
_refine_ls_shift/su_max           0.001 
_refine_ls_shift/su_mean          0.000 
 
loop_ 
 _atom_site_label 
 _atom_site_type_symbol 
 _atom_site_fract_x 
 _atom_site_fract_y 
 _atom_site_fract_z 
 _atom_site_U_iso_or_equiv 
 _atom_site_adp_type 
 _atom_site_occupancy 
 _atom_site_symmetry_multiplicity 
 _atom_site_calc_flag 
 _atom_site_refinement_flags 
 _atom_site_disorder_assembly 
 _atom_site_disorder_group 
Pt1 Pt 0.121636(6) 0.513351(14) 0.165017(3) 0.01146(4) Uani 1 1 d . . . 
Cl1 Cl 0.17669(5) 0.60403(12) 0.26483(2) 0.02048(11) Uani 1 1 d . . . 
N11 N -0.04596(16) 0.5955(4) 0.16834(8) 0.0168(3) Uani 1 1 d . . . 
H11A H -0.0938 0.5186 0.1368 0.025 Uiso 1 1 calc R . . 
H11B H -0.0570 0.7757 0.1672 0.025 Uiso 1 1 calc R . . 
H11C H -0.0618 0.5289 0.2025 0.025 Uiso 1 1 calc R . . 
N12 N 0.07338(16) 0.4356(4) 0.07664(8) 0.0147(3) Uani 1 1 d . . . 
H12A H 0.1060 0.5583 0.0560 0.022 Uiso 1 1 calc R . . 
H12B H -0.0049 0.4450 0.0654 0.022 Uiso 1 1 calc R . . 
H12C H 0.0975 0.2688 0.0690 0.022 Uiso 1 1 calc R . . 
N13 N 0.28647(16) 0.4226(4) 0.16088(8) 0.0150(3) Uani 1 1 d . . . 
C11 C 0.3420(2) 0.5628(5) 0.12550(11) 0.0202(4) Uani 1 1 d . . . 
H11 H 0.3021 0.7026 0.1018 0.024 Uiso 1 1 calc R . . 
C12 C 0.4558(2) 0.5093(5) 0.12258(13) 0.0259(6) Uani 1 1 d . . . 
H12 H 0.4933 0.6111 0.0972 0.031 Uiso 1 1 calc R . . 
C13 C 0.5142(2) 0.3062(6) 0.15692(11) 0.0260(5) Uani 1 1 d . . . 
H13 H 0.5927 0.2683 0.1562 0.031 Uiso 1 1 calc R . . 
C14 C 0.4561(2) 0.1600(5) 0.19217(11) 0.0271(5) Uani 1 1 d . . . 
H14 H 0.4938 0.0167 0.2155 0.032 Uiso 1 1 calc R . . 
C15 C 0.3423(2) 0.2225(5) 0.19352(10) 0.0216(4) Uani 1 1 d . . . 
H15 H 0.3031 0.1213 0.2182 0.026 Uiso 1 1 calc R . . 
S1S S 0.82556(4) 0.96502(10) 0.03333(2) 0.01216(10) Uani 1 1 d . . . 
F11S F 0.63785(13) 0.9087(3) 0.07476(8) 0.0319(3) Uani 1 1 d . . . 
F12S F 0.60961(13) 0.9072(4) -0.02051(8) 0.0344(4) Uani 1 1 d . . . 
F13S F 0.64442(12) 1.2772(3) 0.02739(8) 0.0307(3) Uani 1 1 d . . . 
O11S O 0.84657(14) 1.0812(3) -0.02123(7) 0.0175(3) Uani 1 1 d . . . 
O12S O 0.83634(13) 0.6768(3) 0.03601(7) 0.0177(3) Uani 1 1 d . . . 
O13S O 0.87870(13) 1.1021(3) 0.08707(7) 0.0188(3) Uani 1 1 d . . . 
C1S C 0.6710(2) 1.0198(4) 0.02849(12) 0.0188(5) Uani 1 1 d . . . 
 
loop_ 
 _atom_site_aniso_label 
 _atom_site_aniso_U_11 
 _atom_site_aniso_U_22 
 _atom_site_aniso_U_33 
 _atom_site_aniso_U_23 
 _atom_site_aniso_U_13 
 _atom_site_aniso_U_12 
Pt1 0.01048(5) 0.01366(5) 0.01045(5) 0.00012(2) 0.00269(3) -0.00076(2) 
Cl1 0.0193(2) 0.0297(3) 0.0119(2) -0.00304(19) 0.00183(19) 0.0003(2) 
N11 0.0144(8) 0.0209(9) 0.0156(9) 0.0006(7) 0.0045(7) 0.0009(7) 
N12 0.0127(8) 0.0178(8) 0.0137(9) 0.0000(7) 0.0028(7) -0.0015(7) 
N13 0.0134(8) 0.0171(8) 0.0142(8) -0.0016(7) 0.0018(7) -0.0001(7) 
C11 0.0145(10) 0.0239(10) 0.0222(11) 0.0033(9) 0.0034(9) -0.0005(9) 
C12 0.0167(12) 0.0354(15) 0.0268(14) -0.0005(9) 0.0070(10) -0.0028(9) 
C13 0.0161(11) 0.0382(14) 0.0231(12) -0.0083(10) 0.0028(9) 0.0051(9) 
C14 0.0251(12) 0.0305(13) 0.0235(12) 0.0001(9) 0.0002(10) 0.0119(10) 
C15 0.0246(11) 0.0234(11) 0.0166(11) 0.0032(8) 0.0039(9) 0.0054(9) 
S1S 0.0097(2) 0.0132(2) 0.0139(2) 0.00113(16) 0.00327(18) -0.00055(16) 
F11S 0.0250(8) 0.0351(8) 0.0421(9) 0.0048(7) 0.0221(7) -0.0032(7) 
F12S 0.0157(7) 0.0435(9) 0.0387(9) -0.0139(8) -0.0066(6) -0.0003(7) 
F13S 0.0190(7) 0.0201(7) 0.0544(10) 0.0001(6) 0.0109(7) 0.0047(5) 
O11S 0.0189(8) 0.0188(7) 0.0166(7) 0.0047(6) 0.0078(6) 0.0020(6) 
O12S 0.0173(7) 0.0140(7) 0.0217(8) 0.0020(6) 0.0036(6) 0.0009(6) 
O13S 0.0190(8) 0.0207(8) 0.0154(7) -0.0016(6) 0.0009(6) -0.0050(6) 
C1S 0.0127(10) 0.0205(11) 0.0235(12) -0.0028(8) 0.0044(9) -0.0010(7) 
 
_geom_special_details 
; 
 All esds (except the esd in the dihedral angle between two l.s. planes) 
 are estimated using the full covariance matrix.  The cell esds are taken 
 into account individually in the estimation of esds in distances, angles 
 and torsion angles; correlations between esds in cell parameters are only 
 used when they are defined by crystal symmetry.  An approximate (isotropic) 
 treatment of cell esds is used for estimating esds involving l.s. planes. 
; 
 
loop_ 
 _geom_bond_atom_site_label_1 
 _geom_bond_atom_site_label_2 
 _geom_bond_distance 
 _geom_bond_site_symmetry_2 
 _geom_bond_publ_flag 
Pt1 N13 2.0222(18) . ? 
Pt1 N12 2.0379(18) . ? 
Pt1 N11 2.0404(18) . ? 
Pt1 Cl1 2.3047(5) . ? 
N13 C15 1.341(3) . ? 
N13 C11 1.345(3) . ? 
C11 C12 1.388(3) . ? 
C12 C13 1.382(4) . ? 
C13 C14 1.378(4) . ? 
C14 C15 1.388(3) . ? 
S1S O13S 1.4423(16) . ? 
S1S O12S 1.4466(16) . ? 
S1S O11S 1.4532(16) . ? 
S1S C1S 1.829(2) . ? 
F11S C1S 1.332(3) . ? 
F12S C1S 1.335(3) . ? 
F13S C1S 1.324(3) . ? 
 
loop_ 
 _geom_angle_atom_site_label_1 
 _geom_angle_atom_site_label_2 
 _geom_angle_atom_site_label_3 
 _geom_angle 
 _geom_angle_site_symmetry_1 
 _geom_angle_site_symmetry_3 
 _geom_angle_publ_flag 
N13 Pt1 N12 89.08(7) . . ? 
N13 Pt1 N11 178.54(7) . . ? 
N12 Pt1 N11 90.12(7) . . ? 
N13 Pt1 Cl1 90.84(5) . . ? 
N12 Pt1 Cl1 179.61(6) . . ? 
N11 Pt1 Cl1 89.97(5) . . ? 
C15 N13 C11 119.0(2) . . ? 
C15 N13 Pt1 120.57(16) . . ? 
C11 N13 Pt1 120.46(16) . . ? 
N13 C11 C12 121.9(2) . . ? 
C13 C12 C11 119.3(2) . . ? 
C14 C13 C12 118.5(2) . . ? 
C13 C14 C15 119.8(2) . . ? 
N13 C15 C14 121.5(2) . . ? 
O13S S1S O12S 114.70(10) . . ? 
O13S S1S O11S 115.62(10) . . ? 
O12S S1S O11S 113.94(10) . . ? 
O13S S1S C1S 103.55(11) . . ? 
O12S S1S C1S 103.29(10) . . ? 
O11S S1S C1S 103.55(11) . . ? 
F13S C1S F11S 108.3(2) . . ? 
F13S C1S F12S 108.0(2) . . ? 
F11S C1S F12S 107.73(19) . . ? 
F13S C1S S1S 112.13(16) . . ? 
F11S C1S S1S 110.11(17) . . ? 
F12S C1S S1S 110.51(17) . . ? 
 
loop_ 
 _geom_torsion_atom_site_label_1 
 _geom_torsion_atom_site_label_2 
 _geom_torsion_atom_site_label_3 
 _geom_torsion_atom_site_label_4 
 _geom_torsion 
 _geom_torsion_site_symmetry_1 
 _geom_torsion_site_symmetry_2 
 _geom_torsion_site_symmetry_3 
 _geom_torsion_site_symmetry_4 
 _geom_torsion_publ_flag 
N12 Pt1 N13 C15 -120.09(18) . . . . ? 
Cl1 Pt1 N13 C15 60.29(17) . . . . ? 
N12 Pt1 N13 C11 60.20(18) . . . . ? 
Cl1 Pt1 N13 C11 -119.42(17) . . . . ? 
C15 N13 C11 C12 -1.1(4) . . . . ? 
Pt1 N13 C11 C12 178.63(19) . . . . ? 
N13 C11 C12 C13 0.0(4) . . . . ? 
C11 C12 C13 C14 1.3(4) . . . . ? 
C12 C13 C14 C15 -1.5(4) . . . . ? 
C11 N13 C15 C14 0.9(3) . . . . ? 
Pt1 N13 C15 C14 -178.83(18) . . . . ? 
C13 C14 C15 N13 0.4(4) . . . . ? 
O13S S1S C1S F13S 58.2(2) . . . . ? 
O12S S1S C1S F13S 178.11(18) . . . . ? 
O11S S1S C1S F13S -62.8(2) . . . . ? 
O13S S1S C1S F11S -62.38(17) . . . . ? 
O12S S1S C1S F11S 57.52(18) . . . . ? 
O11S S1S C1S F11S 176.59(16) . . . . ? 
O13S S1S C1S F12S 178.73(16) . . . . ? 
O12S S1S C1S F12S -61.37(19) . . . . ? 
O11S S1S C1S F12S 57.69(18) . . . . ? 
 
loop_ 
 _geom_hbond_atom_site_label_D 
 _geom_hbond_atom_site_label_H 
 _geom_hbond_atom_site_label_A 
 _geom_hbond_distance_DH 
 _geom_hbond_distance_HA 
 _geom_hbond_distance_DA 
 _geom_hbond_angle_DHA 
 _geom_hbond_site_symmetry_A 
N11 H11A O13S  0.91 2.37 3.115(2) 139.5 1_445 
N11 H11A O12S  0.91 2.43 3.109(2) 131.2 1_455 
N11 H11B O13S  0.91 2.47 3.168(3) 134.2 1_455 
N11 H11C Cl1  0.91 2.71 3.433(2) 137.0 2_545 
N12 H12A O11S  0.91 2.10 2.977(2) 162.9 3_675 
N12 H12B O12S  0.91 2.19 3.017(2) 150.7 1_455 
N12 H12C O11S  0.91 2.24 3.115(3) 161.3 3_665 
 
_diffrn_measured_fraction_theta_max    0.999 
_diffrn_reflns_theta_full              28.61 
_diffrn_measured_fraction_theta_full   0.999 
_refine_diff_density_max    0.933 
_refine_diff_density_min   -1.039 
_refine_diff_density_rms    0.116 

_iucr_refine_instructions_details
;
TITL 7 in P21/c
CELL  0.71073   11.8226    4.9998   23.0652    90.000   101.888    90.000
ZERR 4           0.0007    0.0003    0.0013     0.000     0.001     0.000
LATT   1
SYMM             - X ,    0.50000 + Y ,    0.50000 - Z
SFAC C H N O F S CL PT
UNIT 24 44 12 12 12 4 4 4
TEMP  -173
 
L.S. 10
BOND
CONF
ACTA
SIZE 0.32 0.09 0.07
FMAP 2
PLAN 5
 
EQIV $1 x-1, y-1, z
EQIV $2 x-1, y, z
EQIV $3  -x, y-1/2, -z+1/2
EQIV $4 -x+1, -y+2, -z
EQIV $5 -x+1, -y+1, -z
 
HTAB
HTAB N11 o13s_$1
HTAB n11 O12S_$2
HTAB N11 o13s_$2
HTAB n11 cl1_$3
HTAB n12 o11s_$4
HTAB n12 o12s_$2
HTAB n12 o11s_$5
 
WGHT    0.018800    1.671500
FVAR       0.23701
PT1   8    0.121636    0.513351    0.165017    11.00000    0.01048    0.01366 =
         0.01045    0.00012    0.00269   -0.00076
CL1   7    0.176693    0.604032    0.264825    11.00000    0.01926    0.02967 =
         0.01191   -0.00304    0.00183    0.00034
N11   3   -0.045963    0.595519    0.168338    11.00000    0.01435    0.02093 =
         0.01563    0.00057    0.00454    0.00088
AFIX 137
H11A  2   -0.093811    0.518578    0.136783    11.00000   -1.50000
H11B  2   -0.057041    0.775713    0.167197    11.00000   -1.50000
H11C  2   -0.061784    0.528913    0.202517    11.00000   -1.50000
AFIX   0
N12   3    0.073385    0.435605    0.076637    11.00000    0.01273    0.01779 =
         0.01366    0.00003    0.00276   -0.00149
AFIX 137
H12A  2    0.106048    0.558320    0.055991    11.00000   -1.50000
H12B  2   -0.004950    0.444956    0.065422    11.00000   -1.50000
H12C  2    0.097510    0.268820    0.069033    11.00000   -1.50000
AFIX   0
N13   3    0.286468    0.422586    0.160878    11.00000    0.01343    0.01706 =
         0.01418   -0.00156    0.00183   -0.00008
C11   1    0.341970    0.562845    0.125498    11.00000    0.01448    0.02387 =
         0.02216    0.00332    0.00339   -0.00051
AFIX  43
H11   2    0.302086    0.702591    0.101830    11.00000   -1.20000
AFIX   0
C12   1    0.455846    0.509260    0.122578    11.00000    0.01668    0.03538 =
         0.02679   -0.00049    0.00700   -0.00279
AFIX  43
H12   2    0.493253    0.611072    0.097248    11.00000   -1.20000
AFIX   0
C13   1    0.514199    0.306221    0.156915    11.00000    0.01606    0.03818 =
         0.02314   -0.00830    0.00280    0.00509
AFIX  43
H13   2    0.592653    0.268303    0.156234    11.00000   -1.20000
AFIX   0
C14   1    0.456088    0.159950    0.192169    11.00000    0.02511    0.03055 =
         0.02348    0.00011    0.00019    0.01195
AFIX  43
H14   2    0.493803    0.016652    0.215483    11.00000   -1.20000
AFIX   0
C15   1    0.342318    0.222537    0.193524    11.00000    0.02456    0.02340 =
         0.01663    0.00316    0.00393    0.00539
AFIX  43
H15   2    0.303078    0.121324    0.218150    11.00000   -1.20000
AFIX   0
S1S   6    0.825562    0.965025    0.033333    11.00000    0.00974    0.01322 =
         0.01387    0.00113    0.00327   -0.00055
F11S  5    0.637851    0.908694    0.074764    11.00000    0.02501    0.03509 =
         0.04208    0.00484    0.02208   -0.00320
F12S  5    0.609612    0.907173   -0.020514    11.00000    0.01568    0.04345 =
         0.03872   -0.01394   -0.00659   -0.00029
F13S  5    0.644421    1.277186    0.027390    11.00000    0.01896    0.02010 =
         0.05437    0.00009    0.01094    0.00465
O11S  4    0.846569    1.081216   -0.021229    11.00000    0.01890    0.01880 =
         0.01665    0.00473    0.00785    0.00203
O12S  4    0.836336    0.676850    0.036009    11.00000    0.01733    0.01400 =
         0.02170    0.00202    0.00364    0.00089
O13S  4    0.878696    1.102141    0.087072    11.00000    0.01896    0.02071 =
         0.01545   -0.00158    0.00087   -0.00498
C1S   1    0.670965    1.019783    0.028489    11.00000    0.01267    0.02054 =
         0.02353   -0.00279    0.00444   -0.00102
 
HKLF 4
 
REM  7 in P21/c
REM R1 =  0.0143 for   3286 Fo > 4sig(Fo)  and  0.0155 for all   3420 data
REM    165 parameters refined using      0 restraints
 
END  
     
WGHT      0.0188      1.6715 
REM Highest difference peak  0.933,  deepest hole -1.039,  1-sigma level  0.116
Q1    1   0.1226  0.6798  0.1657  11.00000  0.05    0.93
Q2    1   0.1273  0.3473  0.1660  11.00000  0.05    0.87
Q3    1   0.1507  0.5051  0.2005  11.00000  0.05    0.45
Q4    1   0.2317  0.4456  0.1589  11.00000  0.05    0.43
Q5    1   0.8351  0.8064  0.0328  11.00000  0.05    0.41
;

#===END

 
 
data_8 
 
_audit_creation_method            SHELXL-97 
_chemical_name_systematic 
; 
 ? 
; 
_chemical_name_common             ? 
_chemical_melting_point           ? 
_chemical_formula_moiety          ? 
_chemical_formula_sum 
 'C13 H18 F6 N8 O7 Pt S2' 
_chemical_formula_weight          771.56 
 
loop_ 
 _atom_type_symbol 
 _atom_type_description 
 _atom_type_scat_dispersion_real 
 _atom_type_scat_dispersion_imag 
 _atom_type_scat_source 
 'C'  'C'   0.0033   0.0016 
 'International Tables Vol C Tables 4.2.6.8 and 6.1.1.4' 
 'H'  'H'   0.0000   0.0000 
 'International Tables Vol C Tables 4.2.6.8 and 6.1.1.4' 
 'N'  'N'   0.0061   0.0033 
 'International Tables Vol C Tables 4.2.6.8 and 6.1.1.4' 
 'O'  'O'   0.0106   0.0060 
 'International Tables Vol C Tables 4.2.6.8 and 6.1.1.4' 
 'F'  'F'   0.0171   0.0103 
 'International Tables Vol C Tables 4.2.6.8 and 6.1.1.4' 
 'S'  'S'   0.1246   0.1234 
 'International Tables Vol C Tables 4.2.6.8 and 6.1.1.4' 
 'Pt'  'Pt'  -1.7033   8.3905 
 'International Tables Vol C Tables 4.2.6.8 and 6.1.1.4' 
 
_symmetry_cell_setting            Monoclinic 
_symmetry_space_group_name_H-M    C2/c 
 
loop_ 
 _symmetry_equiv_pos_as_xyz 
 'x, y, z' 
 '-x, y, -z+1/2' 
 'x+1/2, y+1/2, z' 
 '-x+1/2, y+1/2, -z+1/2' 
 '-x, -y, -z' 
 'x, -y, z-1/2' 
 '-x+1/2, -y+1/2, -z' 
 'x+1/2, -y+1/2, z-1/2' 
 
_cell_length_a                    24.6325(9) 
_cell_length_b                    11.4033(4) 
_cell_length_c                    19.3606(7) 
_cell_angle_alpha                 90.00 
_cell_angle_beta                  92.3990(10) 
_cell_angle_gamma                 90.00 
_cell_volume                      5433.5(3) 
_cell_formula_units_Z             8 
_cell_measurement_temperature     100(2) 
_cell_measurement_reflns_used     9992 
_cell_measurement_theta_min       2.22 
_cell_measurement_theta_max       28.66 
 
_exptl_crystal_description        plate 
_exptl_crystal_colour             colourless 
_exptl_crystal_size_max           0.03 
_exptl_crystal_size_mid           0.03 
_exptl_crystal_size_min           0.01 
_exptl_crystal_density_meas       ? 
_exptl_crystal_density_diffrn     1.886 
_exptl_crystal_density_method     'not measured' 
_exptl_crystal_F_000              2976 
_exptl_absorpt_coefficient_mu     5.406 
_exptl_absorpt_correction_type    multi-scan 
_exptl_absorpt_correction_T_min   0.8546 
_exptl_absorpt_correction_T_max   0.9479 
_exptl_absorpt_process_details    'Blessing, 1995' 
 
_exptl_special_details 
; 
 ? 
; 
 
_diffrn_ambient_temperature       100(2) 
_diffrn_radiation_wavelength      0.71073 
_diffrn_radiation_type            MoK\a 
_diffrn_radiation_source          'fine-focus sealed tube' 
_diffrn_radiation_monochromator   graphite 
_diffrn_measurement_device_type  'CCD area detector'
_diffrn_measurement_method       'phi and omega scans'
_diffrn_detector_area_resol_mean  ? 
_diffrn_standards_number          ? 
_diffrn_standards_interval_count  ? 
_diffrn_standards_interval_time   ? 
_diffrn_standards_decay_%         ? 
_diffrn_reflns_number             53900 
_diffrn_reflns_av_R_equivalents   0.0448 
_diffrn_reflns_av_sigmaI/netI     0.0269 
_diffrn_reflns_limit_h_min        -33 
_diffrn_reflns_limit_h_max        33 
_diffrn_reflns_limit_k_min        -15 
_diffrn_reflns_limit_k_max        15 
_diffrn_reflns_limit_l_min        -26 
_diffrn_reflns_limit_l_max        26 
_diffrn_reflns_theta_min          1.65 
_diffrn_reflns_theta_max          28.67 
_reflns_number_total              6996 
_reflns_number_gt                 6141 
_reflns_threshold_expression      >2sigma(I) 
 
_computing_data_collection      'Bruker SMART'
_computing_cell_refinement      'Bruker SMART'
_computing_data_reduction       'Bruker SAINT'
_computing_structure_solution   'Bruker SHELXTL'
_computing_structure_refinement 'Bruker SHELXTL'
_computing_molecular_graphics   'Bruker SHELXTL'
_computing_publication_material 'Bruker SHELXTL'
 
_refine_special_details 
; 
 Refinement of F^2^ against ALL reflections.  The weighted R-factor wR and 
 goodness of fit S are based on F^2^, conventional R-factors R are based 
 on F, with F set to zero for negative F^2^. The threshold expression of 
 F^2^ > 2sigma(F^2^) is used only for calculating R-factors(gt) etc. and is 
 not relevant to the choice of reflections for refinement.  R-factors based 
 on F^2^ are statistically about twice as large as those based on F, and R- 
 factors based on ALL data will be even larger. 
; 
 
_refine_ls_structure_factor_coef  Fsqd  
_refine_ls_matrix_type            full 
_refine_ls_weighting_scheme       calc  
_refine_ls_weighting_details 
 'calc w=1/[\s^2^(Fo^2^)+(0.0238P)^2^+1.8157P] where P=(Fo^2^+2Fc^2^)/3' 
_atom_sites_solution_primary      heavy
_atom_sites_solution_secondary    difmap 
_atom_sites_solution_hydrogens    geom 
_refine_ls_hydrogen_treatment     constr
_refine_ls_extinction_method      none 
_refine_ls_extinction_coef        ? 
_refine_ls_number_reflns          6996 
_refine_ls_number_parameters      337 
_refine_ls_number_restraints      0 
_refine_ls_R_factor_all           0.0279 
_refine_ls_R_factor_gt            0.0216 
_refine_ls_wR_factor_ref          0.0472 
_refine_ls_wR_factor_gt           0.0456 
_refine_ls_goodness_of_fit_ref    1.042 
_refine_ls_restrained_S_all       1.042 
_refine_ls_shift/su_max           0.007 
_refine_ls_shift/su_mean          0.000 
 
loop_ 
 _atom_site_label 
 _atom_site_type_symbol 
 _atom_site_fract_x 
 _atom_site_fract_y 
 _atom_site_fract_z 
 _atom_site_U_iso_or_equiv 
 _atom_site_adp_type 
 _atom_site_occupancy 
 _atom_site_symmetry_multiplicity 
 _atom_site_calc_flag 
 _atom_site_refinement_flags 
 _atom_site_disorder_assembly 
 _atom_site_disorder_group 
Pt1 Pt 0.784193(4) 0.423853(8) 0.419793(4) 0.01085(3) Uani 1 1 d . . . 
N1 N 0.70157(9) 0.42854(18) 0.40707(11) 0.0154(4) Uani 1 1 d . . . 
H1A H 0.6868 0.4439 0.4484 0.023 Uiso 1 1 calc R . . 
H1B H 0.6893 0.3580 0.3909 0.023 Uiso 1 1 calc R . . 
H1C H 0.6918 0.4858 0.3763 0.023 Uiso 1 1 calc R . . 
N2 N 0.78137(9) 0.52988(19) 0.50450(10) 0.0151(4) Uani 1 1 d . . . 
H2A H 0.8115 0.5762 0.5071 0.023 Uiso 1 1 calc R . . 
H2B H 0.7802 0.4850 0.5433 0.023 Uiso 1 1 calc R . . 
H2C H 0.7512 0.5757 0.5008 0.023 Uiso 1 1 calc R . . 
N3 N 0.86576(9) 0.41791(18) 0.43226(11) 0.0142(4) Uani 1 1 d . . . 
C1 C 0.89029(11) 0.3561(2) 0.48376(13) 0.0174(5) Uani 1 1 d . . . 
H1 H 0.8685 0.3179 0.5163 0.021 Uiso 1 1 calc R . . 
C2 C 0.94622(11) 0.3462(2) 0.49084(14) 0.0214(6) Uani 1 1 d . . . 
H2 H 0.9625 0.3020 0.5278 0.026 Uiso 1 1 calc R . . 
C3 C 0.97812(12) 0.4011(2) 0.44387(15) 0.0221(6) Uani 1 1 d . . . 
H3 H 1.0166 0.3939 0.4472 0.026 Uiso 1 1 calc R . . 
C4 C 0.95297(12) 0.4671(3) 0.39159(15) 0.0237(6) Uani 1 1 d . . . 
H4 H 0.9741 0.5076 0.3593 0.028 Uiso 1 1 calc R . . 
C5 C 0.89694(11) 0.4734(2) 0.38684(13) 0.0189(5) Uani 1 1 d . . . 
H5 H 0.8799 0.5180 0.3506 0.023 Uiso 1 1 calc R . . 
O1 O 0.82221(8) 0.14044(16) 0.45226(9) 0.0203(4) Uani 1 1 d . . . 
N11 N 0.78816(9) 0.31869(17) 0.33632(10) 0.0123(4) Uani 1 1 d . . . 
N12 N 0.78567(9) 0.25580(17) 0.22814(10) 0.0141(4) Uani 1 1 d . . . 
N13 N 0.82153(9) 0.05909(18) 0.24274(11) 0.0168(5) Uani 1 1 d . . . 
N14 N 0.84149(10) 0.02019(19) 0.36194(11) 0.0188(5) Uani 1 1 d . . . 
H14 H 0.8551 -0.0318 0.3915 0.023 Uiso 1 1 calc R . . 
N15 N 0.85643(11) -0.1195(2) 0.27946(12) 0.0276(6) Uani 1 1 d . . . 
H15A H 0.8555 -0.1451 0.2365 0.033 Uiso 1 1 calc R . . 
H15B H 0.8684 -0.1655 0.3133 0.033 Uiso 1 1 calc R . . 
C11 C 0.77541(10) 0.3460(2) 0.27150(12) 0.0142(5) Uani 1 1 d . . . 
H11 H 0.7609 0.4196 0.2569 0.017 Uiso 1 1 calc R . . 
C12 C 0.80694(10) 0.1663(2) 0.26740(12) 0.0123(5) Uani 1 1 d . . . 
C13 C 0.83966(11) -0.0107(2) 0.29332(14) 0.0194(6) Uani 1 1 d . . . 
C15 C 0.80872(10) 0.2052(2) 0.33493(12) 0.0132(5) Uani 1 1 d . . . 
C14 C 0.82381(11) 0.1268(2) 0.38954(13) 0.0162(5) Uani 1 1 d . . . 
C16 C 0.77277(12) 0.2515(2) 0.15380(12) 0.0207(6) Uani 1 1 d . . . 
H16A H 0.7565 0.3262 0.1387 0.031 Uiso 1 1 calc R . . 
H16B H 0.7470 0.1877 0.1437 0.031 Uiso 1 1 calc R . . 
H16C H 0.8061 0.2378 0.1291 0.031 Uiso 1 1 calc R . . 
S1S S 0.83501(3) 0.60906(5) 0.18965(3) 0.01453(13) Uani 1 1 d . . . 
O11S O 0.82492(8) 0.61756(17) 0.26214(9) 0.0196(4) Uani 1 1 d . . . 
O12S O 0.84998(8) 0.71827(16) 0.15713(9) 0.0213(4) Uani 1 1 d . . . 
O13S O 0.79634(8) 0.53901(17) 0.14976(9) 0.0202(4) Uani 1 1 d . . . 
C1S C 0.89735(12) 0.5229(2) 0.18819(14) 0.0205(6) Uani 1 1 d . . . 
F11S F 0.93744(7) 0.57367(16) 0.22529(9) 0.0329(4) Uani 1 1 d . . . 
F12S F 0.88982(8) 0.41634(14) 0.21472(10) 0.0326(4) Uani 1 1 d . . . 
F13S F 0.91360(7) 0.50948(16) 0.12393(8) 0.0308(4) Uani 1 1 d . . . 
S2S S 0.87549(3) -0.20968(6) 0.48971(3) 0.02037(14) Uani 1 1 d . . . 
O21S O 0.89497(10) -0.1867(2) 0.42219(11) 0.0397(6) Uani 1 1 d . . . 
O22S O 0.82234(8) -0.16204(19) 0.50042(12) 0.0333(5) Uani 1 1 d . . . 
O23S O 0.88378(8) -0.32673(17) 0.51494(11) 0.0276(5) Uani 1 1 d . . . 
C2S C 0.91943(13) -0.1198(3) 0.54605(19) 0.0345(8) Uani 1 1 d . . . 
F21S F 0.97122(7) -0.15093(17) 0.54289(12) 0.0464(5) Uani 1 1 d . . . 
F22S F 0.90501(10) -0.1279(3) 0.61095(11) 0.0650(7) Uani 1 1 d . . . 
F23S F 0.91556(9) -0.00715(17) 0.52813(14) 0.0608(7) Uani 1 1 d . . . 
 
loop_ 
 _atom_site_aniso_label 
 _atom_site_aniso_U_11 
 _atom_site_aniso_U_22 
 _atom_site_aniso_U_33 
 _atom_site_aniso_U_23 
 _atom_site_aniso_U_13 
 _atom_site_aniso_U_12 
Pt1 0.01350(5) 0.01008(5) 0.00904(5) -0.00073(4) 0.00129(3) 0.00118(4) 
N1 0.0161(11) 0.0151(10) 0.0149(10) -0.0008(9) 0.0007(8) 0.0006(9) 
N2 0.0171(11) 0.0153(10) 0.0130(10) -0.0022(9) -0.0001(8) 0.0015(9) 
N3 0.0166(11) 0.0144(10) 0.0115(9) -0.0042(8) 0.0000(8) 0.0012(9) 
C1 0.0213(14) 0.0150(12) 0.0156(12) 0.0005(10) -0.0005(10) -0.0007(10) 
C2 0.0225(15) 0.0214(14) 0.0199(13) 0.0005(11) -0.0031(11) 0.0032(11) 
C3 0.0167(14) 0.0235(14) 0.0258(14) -0.0029(11) -0.0007(11) 0.0016(11) 
C4 0.0179(14) 0.0317(15) 0.0219(14) 0.0042(12) 0.0049(11) -0.0008(12) 
C5 0.0175(14) 0.0243(14) 0.0150(12) 0.0033(11) 0.0008(10) 0.0021(11) 
O1 0.0322(11) 0.0161(9) 0.0125(9) 0.0001(7) 0.0006(8) 0.0011(8) 
N11 0.0157(11) 0.0095(9) 0.0118(10) -0.0018(8) 0.0016(8) 0.0008(8) 
N12 0.0189(11) 0.0121(10) 0.0114(10) 0.0002(8) 0.0022(8) -0.0001(8) 
N13 0.0214(12) 0.0114(10) 0.0175(11) -0.0033(9) 0.0009(9) 0.0022(9) 
N14 0.0285(13) 0.0107(10) 0.0169(11) 0.0018(9) -0.0029(9) 0.0040(9) 
N15 0.0462(17) 0.0140(11) 0.0221(12) -0.0048(10) -0.0041(11) 0.0109(11) 
C11 0.0175(13) 0.0118(11) 0.0134(11) 0.0011(10) 0.0007(10) -0.0004(10) 
C12 0.0131(12) 0.0105(11) 0.0134(11) -0.0014(9) 0.0021(9) -0.0008(9) 
C13 0.0226(15) 0.0151(13) 0.0205(13) -0.0040(11) -0.0005(11) 0.0020(11) 
C15 0.0139(12) 0.0115(12) 0.0143(11) -0.0004(9) 0.0011(9) 0.0012(9) 
C14 0.0163(13) 0.0156(12) 0.0169(12) -0.0005(10) 0.0017(10) 0.0003(10) 
C16 0.0355(17) 0.0166(13) 0.0101(11) -0.0013(10) 0.0004(11) 0.0015(12) 
S1S 0.0186(3) 0.0133(3) 0.0117(3) -0.0005(2) 0.0002(2) 0.0038(2) 
O11S 0.0255(11) 0.0207(9) 0.0128(9) -0.0016(8) 0.0028(8) 0.0060(8) 
O12S 0.0293(11) 0.0144(9) 0.0203(9) 0.0035(8) 0.0019(8) 0.0027(8) 
O13S 0.0238(10) 0.0204(9) 0.0160(9) -0.0026(8) -0.0027(8) 0.0003(8) 
C1S 0.0218(15) 0.0216(14) 0.0183(13) 0.0006(11) 0.0032(11) 0.0063(11) 
F11S 0.0204(9) 0.0433(11) 0.0342(10) -0.0025(8) -0.0073(8) 0.0036(8) 
F12S 0.0363(11) 0.0219(9) 0.0400(11) 0.0095(8) 0.0059(8) 0.0129(8) 
F13S 0.0319(10) 0.0387(11) 0.0224(9) -0.0009(8) 0.0113(7) 0.0125(8) 
S2S 0.0215(4) 0.0194(3) 0.0201(3) 0.0041(3) -0.0005(3) 0.0028(3) 
O21S 0.0521(16) 0.0449(14) 0.0228(11) 0.0094(10) 0.0079(11) 0.0026(12) 
O22S 0.0195(11) 0.0365(13) 0.0434(13) 0.0021(10) -0.0030(10) 0.0078(9) 
O23S 0.0276(11) 0.0189(10) 0.0357(12) 0.0103(9) -0.0051(9) 0.0015(8) 
C2S 0.0256(17) 0.0310(17) 0.047(2) -0.0059(16) -0.0029(15) 0.0048(14) 
F21S 0.0209(10) 0.0361(11) 0.0815(16) -0.0116(11) -0.0086(10) 0.0053(8) 
F22S 0.0564(16) 0.101(2) 0.0368(12) -0.0287(13) -0.0039(11) -0.0024(15) 
F23S 0.0433(13) 0.0227(10) 0.115(2) -0.0123(12) -0.0173(13) 0.0040(9) 
 
_geom_special_details 
; 
 All esds (except the esd in the dihedral angle between two l.s. planes) 
 are estimated using the full covariance matrix.  The cell esds are taken 
 into account individually in the estimation of esds in distances, angles 
 and torsion angles; correlations between esds in cell parameters are only 
 used when they are defined by crystal symmetry.  An approximate (isotropic) 
 treatment of cell esds is used for estimating esds involving l.s. planes. 
; 
 
loop_ 
 _geom_bond_atom_site_label_1 
 _geom_bond_atom_site_label_2 
 _geom_bond_distance 
 _geom_bond_site_symmetry_2 
 _geom_bond_publ_flag 
Pt1 N3 2.015(2) . ? 
Pt1 N11 2.018(2) . ? 
Pt1 N1 2.041(2) . ? 
Pt1 N2 2.041(2) . ? 
N3 C1 1.344(3) . ? 
N3 C5 1.349(3) . ? 
C1 C2 1.383(4) . ? 
C2 C3 1.377(4) . ? 
C3 C4 1.387(4) . ? 
C4 C5 1.381(4) . ? 
O1 C14 1.227(3) . ? 
N11 C11 1.318(3) . ? 
N11 C15 1.390(3) . ? 
N12 C11 1.359(3) . ? 
N12 C12 1.364(3) . ? 
N12 C16 1.462(3) . ? 
N13 C13 1.325(3) . ? 
N13 C12 1.366(3) . ? 
N14 C13 1.373(3) . ? 
N14 C14 1.404(3) . ? 
N15 C13 1.338(3) . ? 
C12 C15 1.380(3) . ? 
C15 C14 1.422(3) . ? 
S1S O11S 1.4389(18) . ? 
S1S O13S 1.4422(19) . ? 
S1S O12S 1.4501(19) . ? 
S1S C1S 1.824(3) . ? 
C1S F11S 1.329(3) . ? 
C1S F13S 1.332(3) . ? 
C1S F12S 1.335(3) . ? 
S2S O23S 1.4330(19) . ? 
S2S O21S 1.435(2) . ? 
S2S O22S 1.440(2) . ? 
S2S C2S 1.820(3) . ? 
C2S F22S 1.323(4) . ? 
C2S F21S 1.328(4) . ? 
C2S F23S 1.333(4) . ? 
 
loop_ 
 _geom_angle_atom_site_label_1 
 _geom_angle_atom_site_label_2 
 _geom_angle_atom_site_label_3 
 _geom_angle 
 _geom_angle_site_symmetry_1 
 _geom_angle_site_symmetry_3 
 _geom_angle_publ_flag 
N3 Pt1 N11 89.69(8) . . ? 
N3 Pt1 N1 179.57(8) . . ? 
N11 Pt1 N1 90.02(8) . . ? 
N3 Pt1 N2 89.49(8) . . ? 
N11 Pt1 N2 179.17(8) . . ? 
N1 Pt1 N2 90.81(8) . . ? 
C1 N3 C5 118.6(2) . . ? 
C1 N3 Pt1 121.45(18) . . ? 
C5 N3 Pt1 119.87(17) . . ? 
N3 C1 C2 122.1(3) . . ? 
C3 C2 C1 119.4(3) . . ? 
C2 C3 C4 118.6(3) . . ? 
C5 C4 C3 119.4(3) . . ? 
N3 C5 C4 121.8(2) . . ? 
C11 N11 C15 105.9(2) . . ? 
C11 N11 Pt1 127.17(17) . . ? 
C15 N11 Pt1 126.76(16) . . ? 
C11 N12 C12 107.4(2) . . ? 
C11 N12 C16 126.5(2) . . ? 
C12 N12 C16 125.9(2) . . ? 
C13 N13 C12 111.4(2) . . ? 
C13 N14 C14 126.3(2) . . ? 
N11 C11 N12 111.5(2) . . ? 
N12 C12 N13 125.1(2) . . ? 
N12 C12 C15 106.5(2) . . ? 
N13 C12 C15 128.4(2) . . ? 
N13 C13 N15 120.4(2) . . ? 
N13 C13 N14 123.9(2) . . ? 
N15 C13 N14 115.7(2) . . ? 
C12 C15 N11 108.7(2) . . ? 
C12 C15 C14 119.9(2) . . ? 
N11 C15 C14 130.9(2) . . ? 
O1 C14 N14 120.7(2) . . ? 
O1 C14 C15 129.6(2) . . ? 
N14 C14 C15 109.7(2) . . ? 
O11S S1S O13S 114.99(12) . . ? 
O11S S1S O12S 115.03(11) . . ? 
O13S S1S O12S 114.68(11) . . ? 
O11S S1S C1S 103.37(12) . . ? 
O13S S1S C1S 103.35(12) . . ? 
O12S S1S C1S 103.08(13) . . ? 
F11S C1S F13S 108.0(2) . . ? 
F11S C1S F12S 107.5(2) . . ? 
F13S C1S F12S 107.9(2) . . ? 
F11S C1S S1S 111.35(19) . . ? 
F13S C1S S1S 111.25(18) . . ? 
F12S C1S S1S 110.7(2) . . ? 
O23S S2S O21S 115.59(14) . . ? 
O23S S2S O22S 114.81(13) . . ? 
O21S S2S O22S 113.76(14) . . ? 
O23S S2S C2S 104.33(14) . . ? 
O21S S2S C2S 103.30(16) . . ? 
O22S S2S C2S 102.86(14) . . ? 
F22S C2S F21S 108.8(3) . . ? 
F22S C2S F23S 107.2(3) . . ? 
F21S C2S F23S 107.7(3) . . ? 
F22S C2S S2S 110.7(2) . . ? 
F21S C2S S2S 111.7(2) . . ? 
F23S C2S S2S 110.6(2) . . ? 
 
loop_ 
 _geom_torsion_atom_site_label_1 
 _geom_torsion_atom_site_label_2 
 _geom_torsion_atom_site_label_3 
 _geom_torsion_atom_site_label_4 
 _geom_torsion 
 _geom_torsion_site_symmetry_1 
 _geom_torsion_site_symmetry_2 
 _geom_torsion_site_symmetry_3 
 _geom_torsion_site_symmetry_4 
 _geom_torsion_publ_flag 
N11 Pt1 N3 C1 -107.0(2) . . . . ? 
N2 Pt1 N3 C1 72.9(2) . . . . ? 
N11 Pt1 N3 C5 70.6(2) . . . . ? 
N2 Pt1 N3 C5 -109.5(2) . . . . ? 
C5 N3 C1 C2 -1.0(4) . . . . ? 
Pt1 N3 C1 C2 176.59(19) . . . . ? 
N3 C1 C2 C3 -0.1(4) . . . . ? 
C1 C2 C3 C4 1.5(4) . . . . ? 
C2 C3 C4 C5 -1.8(4) . . . . ? 
C1 N3 C5 C4 0.7(4) . . . . ? 
Pt1 N3 C5 C4 -176.9(2) . . . . ? 
C3 C4 C5 N3 0.7(4) . . . . ? 
N3 Pt1 N11 C11 -113.8(2) . . . . ? 
N1 Pt1 N11 C11 66.5(2) . . . . ? 
N3 Pt1 N11 C15 61.0(2) . . . . ? 
N1 Pt1 N11 C15 -118.7(2) . . . . ? 
C15 N11 C11 N12 1.1(3) . . . . ? 
Pt1 N11 C11 N12 176.79(16) . . . . ? 
C12 N12 C11 N11 -0.9(3) . . . . ? 
C16 N12 C11 N11 175.0(2) . . . . ? 
C11 N12 C12 N13 178.6(2) . . . . ? 
C16 N12 C12 N13 2.6(4) . . . . ? 
C11 N12 C12 C15 0.4(3) . . . . ? 
C16 N12 C12 C15 -175.6(2) . . . . ? 
C13 N13 C12 N12 -178.4(2) . . . . ? 
C13 N13 C12 C15 -0.6(4) . . . . ? 
C12 N13 C13 N15 -179.4(3) . . . . ? 
C12 N13 C13 N14 2.2(4) . . . . ? 
C14 N14 C13 N13 1.6(4) . . . . ? 
C14 N14 C13 N15 -176.9(3) . . . . ? 
N12 C12 C15 N11 0.3(3) . . . . ? 
N13 C12 C15 N11 -177.9(2) . . . . ? 
N12 C12 C15 C14 173.4(2) . . . . ? 
N13 C12 C15 C14 -4.7(4) . . . . ? 
C11 N11 C15 C12 -0.8(3) . . . . ? 
Pt1 N11 C15 C12 -176.56(17) . . . . ? 
C11 N11 C15 C14 -173.0(3) . . . . ? 
Pt1 N11 C15 C14 11.3(4) . . . . ? 
C13 N14 C14 O1 172.5(3) . . . . ? 
C13 N14 C14 C15 -6.3(4) . . . . ? 
C12 C15 C14 O1 -171.3(3) . . . . ? 
N11 C15 C14 O1 0.1(5) . . . . ? 
C12 C15 C14 N14 7.4(3) . . . . ? 
N11 C15 C14 N14 178.8(2) . . . . ? 
O11S S1S C1S F11S -57.6(2) . . . . ? 
O13S S1S C1S F11S -177.76(19) . . . . ? 
O12S S1S C1S F11S 62.5(2) . . . . ? 
O11S S1S C1S F13S -178.13(19) . . . . ? 
O13S S1S C1S F13S 61.7(2) . . . . ? 
O12S S1S C1S F13S -58.0(2) . . . . ? 
O11S S1S C1S F12S 61.9(2) . . . . ? 
O13S S1S C1S F12S -58.2(2) . . . . ? 
O12S S1S C1S F12S -177.95(18) . . . . ? 
O23S S2S C2S F22S -61.2(3) . . . . ? 
O21S S2S C2S F22S 177.5(2) . . . . ? 
O22S S2S C2S F22S 58.9(3) . . . . ? 
O23S S2S C2S F21S 60.1(3) . . . . ? 
O21S S2S C2S F21S -61.1(3) . . . . ? 
O22S S2S C2S F21S -179.7(2) . . . . ? 
O23S S2S C2S F23S -179.9(2) . . . . ? 
O21S S2S C2S F23S 58.9(3) . . . . ? 
O22S S2S C2S F23S -59.7(3) . . . . ? 
 
loop_ 
 _geom_hbond_atom_site_label_D 
 _geom_hbond_atom_site_label_H 
 _geom_hbond_atom_site_label_A 
 _geom_hbond_distance_DH 
 _geom_hbond_distance_HA 
 _geom_hbond_distance_DA 
 _geom_hbond_angle_DHA 
 _geom_hbond_site_symmetry_A 
N1 H1A O1  0.91 2.17 2.918(3) 138.9 7_656 
N1 H1B O12S  0.91 2.07 2.962(3) 168.3 4_645 
N1 H1C N13  0.91 2.46 3.289(3) 151.5 4_655 
N2 H2A O23S  0.91 2.10 3.006(3) 176.4 1_565 
N2 H2B O13S  0.91 2.10 2.928(3) 150.7 6_566 
N2 H2C O22S  0.91 2.06 2.964(3) 172.4 7_656 
N14 H14 O21S  0.88 2.10 2.922(3) 156.0 . 
N15 H15A O12S  0.88 2.19 3.004(3) 153.8 1_545 
N15 H15B O21S  0.88 2.19 2.984(3) 149.1 . 
 
_diffrn_measured_fraction_theta_max    0.999 
_diffrn_reflns_theta_full              28.67 
_diffrn_measured_fraction_theta_full   0.999 
_refine_diff_density_max    1.020 
_refine_diff_density_min   -0.669 

_iucr_refine_instructions_details
;
TITL 8 in C2/c
CELL 0.71073  24.6325  11.4033  19.3606  90.000  92.399  90.000
ZERR    8.00   0.0009   0.0004   0.0007   0.000   0.001   0.000
LATT  7
SYMM -X, Y, 0.5-Z
SFAC C H N O F S PT
UNIT 104 144 64 56 48 16 8
TEMP -173
 
ACTA
 
L.S. 10
BOND
CONF
SIZE 0.03 0.03 0.01
FMAP 2
PLAN 5
 
HTAB
 
EQIV $1 -x+3/2, -y+1/2, -z+1
EQIV $2 -x+3/2, y-1/2, -z+1/2
EQIV $3 -x+3/2, y+1/2, -z+1/2
EQIV $4 x, y+1, z
EQIV $5 x, -y+1, z+1/2
EQIV $6 x, y-1, z
 
HTAB n1 o1_$1
HTAB n1 o12s_$2
HTAB n1 n13_$3
HTAB n2 o23s_$4
HTAB n2 o13s_$5
HTAB n2 o22s_$1
HTAB n14 o21s
HTAB n15 o12s_$6
HTAB n15 o21s
 
WGHT    0.023800    1.815700
FVAR       0.36775
PT1   7    0.784193    0.423853    0.419793    11.00000    0.01350    0.01008 =
         0.00904   -0.00073    0.00129    0.00118
N1    3    0.701567    0.428536    0.407073    11.00000    0.01610    0.01515 =
         0.01494   -0.00075    0.00075    0.00061
AFIX 137
H1A   2    0.686762    0.443907    0.448392    11.00000   -1.50000
H1B   2    0.689308    0.358012    0.390897    11.00000   -1.50000
H1C   2    0.691784    0.485778    0.376255    11.00000   -1.50000
AFIX   0
N2    3    0.781369    0.529880    0.504498    11.00000    0.01708    0.01526 =
         0.01298   -0.00222   -0.00006    0.00150
AFIX 137
H2A   2    0.811483    0.576151    0.507129    11.00000   -1.50000
H2B   2    0.780213    0.485023    0.543283    11.00000   -1.50000
H2C   2    0.751151    0.575739    0.500850    11.00000   -1.50000
AFIX   0
N3    3    0.865762    0.417908    0.432261    11.00000    0.01655    0.01441 =
         0.01151   -0.00424    0.00004    0.00117
C1    1    0.890293    0.356058    0.483755    11.00000    0.02134    0.01496 =
         0.01565    0.00046   -0.00047   -0.00067
AFIX  43
H1    2    0.868535    0.317888    0.516321    11.00000   -1.20000
AFIX   0
C2    1    0.946223    0.346213    0.490841    11.00000    0.02254    0.02144 =
         0.01990    0.00045   -0.00315    0.00318
AFIX  43
H2    2    0.962480    0.301985    0.527791    11.00000   -1.20000
AFIX   0
C3    1    0.978120    0.401080    0.443869    11.00000    0.01671    0.02353 =
         0.02581   -0.00289   -0.00072    0.00159
AFIX  43
H3    2    1.016562    0.393857    0.447209    11.00000   -1.20000
AFIX   0
C4    1    0.952968    0.467101    0.391586    11.00000    0.01792    0.03170 =
         0.02191    0.00423    0.00491   -0.00080
AFIX  43
H4    2    0.974096    0.507650    0.359304    11.00000   -1.20000
AFIX   0
C5    1    0.896935    0.473415    0.386837    11.00000    0.01749    0.02434 =
         0.01499    0.00331    0.00082    0.00209
AFIX  43
H5    2    0.879891    0.518042    0.350611    11.00000   -1.20000
AFIX   0
O1    4    0.822207    0.140442    0.452257    11.00000    0.03217    0.01608 =
         0.01248    0.00010    0.00063    0.00106
N11   3    0.788158    0.318694    0.336323    11.00000    0.01570    0.00950 =
         0.01182   -0.00184    0.00163    0.00076
N12   3    0.785671    0.255799    0.228138    11.00000    0.01890    0.01214 =
         0.01144    0.00023    0.00219   -0.00010
N13   3    0.821533    0.059092    0.242745    11.00000    0.02138    0.01140 =
         0.01747   -0.00333    0.00090    0.00224
N14   3    0.841487    0.020194    0.361935    11.00000    0.02848    0.01071 =
         0.01695    0.00183   -0.00295    0.00404
AFIX  43
H14   2    0.855054   -0.031829    0.391462    11.00000   -1.20000
AFIX   0
N15   3    0.856428   -0.119487    0.279461    11.00000    0.04621    0.01397 =
         0.02212   -0.00484   -0.00413    0.01089
AFIX  93
H15A  2    0.855458   -0.145050    0.236540    11.00000   -1.20000
H15B  2    0.868428   -0.165459    0.313268    11.00000   -1.20000
AFIX   0
C11   1    0.775409    0.346045    0.271502    11.00000    0.01751    0.01182 =
         0.01337    0.00108    0.00072   -0.00043
AFIX  43
H11   2    0.760876    0.419594    0.256948    11.00000   -1.20000
AFIX   0
C12   1    0.806942    0.166286    0.267398    11.00000    0.01306    0.01051 =
         0.01337   -0.00137    0.00212   -0.00084
C13   1    0.839657   -0.010707    0.293319    11.00000    0.02255    0.01514 =
         0.02050   -0.00399   -0.00055    0.00203
C15   1    0.808724    0.205225    0.334932    11.00000    0.01395    0.01155 =
         0.01429   -0.00044    0.00113    0.00121
C14   1    0.823808    0.126754    0.389535    11.00000    0.01626    0.01562 =
         0.01691   -0.00055    0.00173    0.00027
C16   1    0.772771    0.251522    0.153799    11.00000    0.03547    0.01660 =
         0.01008   -0.00129    0.00045    0.00149
AFIX 137
H16A  2    0.756523    0.326185    0.138732    11.00000   -1.50000
H16B  2    0.747021    0.187664    0.143707    11.00000   -1.50000
H16C  2    0.806122    0.237848    0.129116    11.00000   -1.50000
AFIX   0
S1S   6    0.835005    0.609057    0.189647    11.00000    0.01859    0.01325 =
         0.01171   -0.00045    0.00017    0.00377
O11S  4    0.824918    0.617562    0.262143    11.00000    0.02554    0.02068 =
         0.01285   -0.00158    0.00276    0.00599
O12S  4    0.849979    0.718269    0.157131    11.00000    0.02927    0.01441 =
         0.02028    0.00348    0.00192    0.00273
O13S  4    0.796341    0.539010    0.149759    11.00000    0.02381    0.02041 =
         0.01598   -0.00262   -0.00270    0.00032
C1S   1    0.897348    0.522906    0.188194    11.00000    0.02183    0.02161 =
         0.01828    0.00065    0.00315    0.00630
F11S  5    0.937443    0.573668    0.225292    11.00000    0.02042    0.04334 =
         0.03416   -0.00246   -0.00726    0.00360
F12S  5    0.889821    0.416341    0.214720    11.00000    0.03632    0.02193 =
         0.04005    0.00946    0.00586    0.01291
F13S  5    0.913601    0.509477    0.123929    11.00000    0.03194    0.03872 =
         0.02245   -0.00092    0.01126    0.01254
S2S   6    0.875495   -0.209675    0.489711    11.00000    0.02148    0.01935 =
         0.02014    0.00407   -0.00053    0.00278
O21S  4    0.894975   -0.186725    0.422186    11.00000    0.05205    0.04493 =
         0.02275    0.00938    0.00788    0.00257
O22S  4    0.822343   -0.162037    0.500424    11.00000    0.01948    0.03648 =
         0.04345    0.00208   -0.00302    0.00776
O23S  4    0.883781   -0.326728    0.514941    11.00000    0.02757    0.01892 =
         0.03575    0.01026   -0.00514    0.00151
C2S   1    0.919433   -0.119804    0.546050    11.00000    0.02559    0.03101 =
         0.04652   -0.00588   -0.00290    0.00478
F21S  5    0.971216   -0.150928    0.542893    11.00000    0.02087    0.03607 =
         0.08146   -0.01162   -0.00859    0.00525
F22S  5    0.905015   -0.127918    0.610951    11.00000    0.05635    0.10142 =
         0.03677   -0.02871   -0.00387   -0.00237
F23S  5    0.915563   -0.007151    0.528132    11.00000    0.04332    0.02274 =
         0.11454   -0.01229   -0.01735    0.00396
 
HKLF 4
 
REM  8 in C2/c
REM R1 =  0.0216 for   6141 Fo > 4sig(Fo)  and  0.0279 for all   6996 data
REM    337 parameters refined using      0 restraints
 
END  
     
WGHT      0.0238      1.8158 
REM Highest difference peak  1.020,  deepest hole -0.669,  1-sigma level  0.105
Q1    1   0.7587  0.3843  0.4049  11.00000  0.05    1.02
Q2    1   0.8229  0.4320  0.4131  11.00000  0.05    0.95
Q3    1   0.8062  0.3840  0.4431  11.00000  0.05    0.84
Q4    1   0.7704  0.4857  0.3955  11.00000  0.05    0.74
Q5    1   0.8683  0.5640  0.1906  11.00000  0.05    0.58
;
_refine_diff_density_rms    0.105 

loop_
  _platon_squeeze_void_nr
  _platon_squeeze_void_average_x
  _platon_squeeze_void_average_y
  _platon_squeeze_void_average_z
  _platon_squeeze_void_volume
  _platon_squeeze_void_count_electrons
         1     0.000     0.012     0.250     228.0      40.8
         2     0.000    -0.012     0.750     227.9      40.8
         3     0.500     0.488     0.750     227.8      40.8
         4     0.500     0.512     0.250     228.0      40.8

#===END

 
data_SI 
 
_audit_creation_method            SHELXL-97 
_chemical_name_systematic 
; 
 ? 
; 
_chemical_name_common             ? 
_chemical_melting_point           ? 
_chemical_formula_moiety          ? 
_chemical_formula_sum 
 'C10 H10 Cl2 N2 Pt' 
_chemical_formula_weight          424.19 
 
loop_ 
 _atom_type_symbol 
 _atom_type_description 
 _atom_type_scat_dispersion_real 
 _atom_type_scat_dispersion_imag 
 _atom_type_scat_source 
 'C'  'C'   0.0033   0.0016 
 'International Tables Vol C Tables 4.2.6.8 and 6.1.1.4' 
 'H'  'H'   0.0000   0.0000 
 'International Tables Vol C Tables 4.2.6.8 and 6.1.1.4' 
 'N'  'N'   0.0061   0.0033 
 'International Tables Vol C Tables 4.2.6.8 and 6.1.1.4' 
 'Cl'  'Cl'   0.1484   0.1585 
 'International Tables Vol C Tables 4.2.6.8 and 6.1.1.4' 
 'Pt'  'Pt'  -1.7033   8.3905 
 'International Tables Vol C Tables 4.2.6.8 and 6.1.1.4' 
 
_symmetry_cell_setting            Triclinic 
_symmetry_space_group_name_H-M    P-1 
 
loop_ 
 _symmetry_equiv_pos_as_xyz 
 'x, y, z' 
 '-x, -y, -z' 
 
_cell_length_a                    5.4655(3) 
_cell_length_b                    6.9612(4) 
_cell_length_c                    7.6303(5) 
_cell_angle_alpha                 79.8420(9) 
_cell_angle_beta                  84.5790(10) 
_cell_angle_gamma                 89.1230(9) 
_cell_volume                      284.48(3) 
_cell_formula_units_Z             1 
_cell_measurement_temperature     100(2) 
_cell_measurement_reflns_used     9050 
_cell_measurement_theta_min       2.724 
_cell_measurement_theta_max       28.749 
 
_exptl_crystal_description        prism 
_exptl_crystal_colour             yellow 
_exptl_crystal_size_max           0.10 
_exptl_crystal_size_mid           0.08 
_exptl_crystal_size_min           0.07 
_exptl_crystal_density_meas       ? 
_exptl_crystal_density_diffrn     2.476 
_exptl_crystal_density_method     'not measured' 
_exptl_crystal_F_000              196 
_exptl_absorpt_coefficient_mu     12.766 
_exptl_absorpt_correction_type    multi-scan 
_exptl_absorpt_correction_T_min   0.3617 
_exptl_absorpt_correction_T_max   0.4685 
_exptl_absorpt_process_details    'Blessing, 1995' 
 
_exptl_special_details 
; 
 ? 
; 
 
_diffrn_ambient_temperature       100(2) 
_diffrn_radiation_wavelength      0.71073 
_diffrn_radiation_type            MoK\a 
_diffrn_radiation_source          'fine-focus sealed tube' 
_diffrn_radiation_monochromator   graphite 
_diffrn_measurement_device_type  'CCD area detector'
_diffrn_measurement_method       'phi and omega scans'
_diffrn_detector_area_resol_mean  ? 
_diffrn_standards_number          ? 
_diffrn_standards_interval_count  ? 
_diffrn_standards_interval_time   ? 
_diffrn_standards_decay_%         ? 
_diffrn_reflns_number             1478 
_diffrn_reflns_av_R_equivalents   0.0000 
_diffrn_reflns_av_sigmaI/netI     0.0165 
_diffrn_reflns_limit_h_min        -7 
_diffrn_reflns_limit_h_max        7 
_diffrn_reflns_limit_k_min        -9 
_diffrn_reflns_limit_k_max        9 
_diffrn_reflns_limit_l_min        0 
_diffrn_reflns_limit_l_max        10 
_diffrn_reflns_theta_min          2.72 
_diffrn_reflns_theta_max          28.75 
_reflns_number_total              1478 
_reflns_number_gt                 1478 
_reflns_threshold_expression      >2sigma(I) 
 
_computing_data_collection      'Bruker SMART'
_computing_cell_refinement      'Bruker SMART'
_computing_data_reduction       'Bruker SAINT'
_computing_structure_solution   'Bruker SHELXTL'
_computing_structure_refinement 'Bruker SHELXTL'
_computing_molecular_graphics   'Bruker SHELXTL'
_computing_publication_material 'Bruker SHELXTL'
 
_refine_special_details 
; 
 Refinement of F^2^ against ALL reflections.  The weighted R-factor wR and 
 goodness of fit S are based on F^2^, conventional R-factors R are based 
 on F, with F set to zero for negative F^2^. The threshold expression of 
 F^2^ > 2sigma(F^2^) is used only for calculating R-factors(gt) etc. and is 
 not relevant to the choice of reflections for refinement.  R-factors based 
 on F^2^ are statistically about twice as large as those based on F, and R- 
 factors based on ALL data will be even larger. 
; 
 
_refine_ls_structure_factor_coef  Fsqd  
_refine_ls_matrix_type            full 
_refine_ls_weighting_scheme       calc  
_refine_ls_weighting_details 
 'calc w=1/[\s^2^(Fo^2^)+(0.0176P)^2^+0.2373P] where P=(Fo^2^+2Fc^2^)/3' 
_atom_sites_solution_primary      direct 
_atom_sites_solution_secondary    difmap 
_atom_sites_solution_hydrogens    difmap
_refine_ls_hydrogen_treatment     constr
_refine_ls_extinction_method      none 
_refine_ls_extinction_coef        ? 
_refine_ls_number_reflns          1478 
_refine_ls_number_parameters      70 
_refine_ls_number_restraints      0 
_refine_ls_R_factor_all           0.0128 
_refine_ls_R_factor_gt            0.0128 
_refine_ls_wR_factor_ref          0.0301 
_refine_ls_wR_factor_gt           0.0301 
_refine_ls_goodness_of_fit_ref    1.047 
_refine_ls_restrained_S_all       1.047 
_refine_ls_shift/su_max           0.000 
_refine_ls_shift/su_mean          0.000 
 
loop_ 
 _atom_site_label 
 _atom_site_type_symbol 
 _atom_site_fract_x 
 _atom_site_fract_y 
 _atom_site_fract_z 
 _atom_site_U_iso_or_equiv 
 _atom_site_adp_type 
 _atom_site_occupancy 
 _atom_site_symmetry_multiplicity 
 _atom_site_calc_flag 
 _atom_site_refinement_flags 
 _atom_site_disorder_assembly 
 _atom_site_disorder_group 
Pt1 Pt 0.5000 0.5000 0.0000 0.01126(4) Uani 1 2 d S . . 
Cl1 Cl 0.44882(11) 0.22006(8) 0.21206(8) 0.01739(11) Uani 1 1 d . . . 
N1 N 0.2559(4) 0.6398(3) 0.1491(3) 0.0128(4) Uani 1 1 d . . . 
C5 C 0.0563(4) 0.7267(3) 0.0800(3) 0.0147(4) Uani 1 1 d . . . 
H5 H 0.0327 0.7237 -0.0413 0.018 Uiso 1 1 calc R . . 
C1 C 0.2895(5) 0.6450(3) 0.3211(3) 0.0164(4) Uani 1 1 d . . . 
H1 H 0.4308 0.5842 0.3699 0.020 Uiso 1 1 calc R . . 
C4 C -0.1154(5) 0.8202(3) 0.1801(3) 0.0171(5) Uani 1 1 d . . . 
H4 H -0.2547 0.8807 0.1281 0.021 Uiso 1 1 calc R . . 
C3 C -0.0823(5) 0.8251(3) 0.3581(3) 0.0183(5) Uani 1 1 d . . . 
H3 H -0.1987 0.8879 0.4294 0.022 Uiso 1 1 calc R . . 
C2 C 0.1239(5) 0.7363(4) 0.4290(3) 0.0190(5) Uani 1 1 d . . . 
H2 H 0.1515 0.7380 0.5498 0.023 Uiso 1 1 calc R . . 
 
loop_ 
 _atom_site_aniso_label 
 _atom_site_aniso_U_11 
 _atom_site_aniso_U_22 
 _atom_site_aniso_U_33 
 _atom_site_aniso_U_23 
 _atom_site_aniso_U_13 
 _atom_site_aniso_U_12 
Pt1 0.01031(7) 0.01349(6) 0.00958(6) -0.00151(4) -0.00016(4) 0.00208(4) 
Cl1 0.0190(3) 0.0170(2) 0.0141(3) 0.00090(19) 0.0019(2) 0.0031(2) 
N1 0.0126(9) 0.0135(8) 0.0119(9) -0.0016(7) 0.0002(7) 0.0004(7) 
C5 0.0145(11) 0.0151(10) 0.0139(11) -0.0016(8) -0.0006(9) 0.0002(8) 
C1 0.0185(12) 0.0164(10) 0.0139(11) -0.0015(8) -0.0022(9) -0.0003(8) 
C4 0.0137(11) 0.0156(10) 0.0215(12) -0.0031(9) 0.0007(9) 0.0000(8) 
C3 0.0188(12) 0.0168(11) 0.0190(12) -0.0061(9) 0.0054(10) -0.0015(9) 
C2 0.0235(13) 0.0200(11) 0.0138(11) -0.0050(9) 0.0008(10) -0.0027(9) 
 
_geom_special_details 
; 
 All esds (except the esd in the dihedral angle between two l.s. planes) 
 are estimated using the full covariance matrix.  The cell esds are taken 
 into account individually in the estimation of esds in distances, angles 
 and torsion angles; correlations between esds in cell parameters are only 
 used when they are defined by crystal symmetry.  An approximate (isotropic) 
 treatment of cell esds is used for estimating esds involving l.s. planes. 
; 
 
loop_ 
 _geom_bond_atom_site_label_1 
 _geom_bond_atom_site_label_2 
 _geom_bond_distance 
 _geom_bond_site_symmetry_2 
 _geom_bond_publ_flag 
Pt1 N1 2.021(2) . ? 
Pt1 N1 2.021(2) 2_665 ? 
Pt1 Cl1 2.3050(6) . ? 
Pt1 Cl1 2.3050(6) 2_665 ? 
N1 C5 1.345(3) . ? 
N1 C1 1.349(3) . ? 
C5 C4 1.382(3) . ? 
C1 C2 1.389(4) . ? 
C4 C3 1.393(4) . ? 
C3 C2 1.386(4) . ? 
 
loop_ 
 _geom_angle_atom_site_label_1 
 _geom_angle_atom_site_label_2 
 _geom_angle_atom_site_label_3 
 _geom_angle 
 _geom_angle_site_symmetry_1 
 _geom_angle_site_symmetry_3 
 _geom_angle_publ_flag 
N1 Pt1 N1 180.0 . 2_665 ? 
N1 Pt1 Cl1 89.93(6) . . ? 
N1 Pt1 Cl1 90.07(6) 2_665 . ? 
N1 Pt1 Cl1 90.07(6) . 2_665 ? 
N1 Pt1 Cl1 89.93(6) 2_665 2_665 ? 
Cl1 Pt1 Cl1 180.000(19) . 2_665 ? 
C5 N1 C1 118.9(2) . . ? 
C5 N1 Pt1 120.87(16) . . ? 
C1 N1 Pt1 120.18(16) . . ? 
N1 C5 C4 121.9(2) . . ? 
N1 C1 C2 122.0(2) . . ? 
C5 C4 C3 119.4(2) . . ? 
C2 C3 C4 118.7(2) . . ? 
C3 C2 C1 119.1(2) . . ? 
 
loop_ 
 _geom_torsion_atom_site_label_1 
 _geom_torsion_atom_site_label_2 
 _geom_torsion_atom_site_label_3 
 _geom_torsion_atom_site_label_4 
 _geom_torsion 
 _geom_torsion_site_symmetry_1 
 _geom_torsion_site_symmetry_2 
 _geom_torsion_site_symmetry_3 
 _geom_torsion_site_symmetry_4 
 _geom_torsion_publ_flag 
Cl1 Pt1 N1 C5 -124.24(17) . . . . ? 
Cl1 Pt1 N1 C5 55.76(17) 2_665 . . . ? 
Cl1 Pt1 N1 C1 54.84(17) . . . . ? 
Cl1 Pt1 N1 C1 -125.16(17) 2_665 . . . ? 
C1 N1 C5 C4 -0.2(3) . . . . ? 
Pt1 N1 C5 C4 178.85(17) . . . . ? 
C5 N1 C1 C2 0.3(3) . . . . ? 
Pt1 N1 C1 C2 -178.79(18) . . . . ? 
N1 C5 C4 C3 -0.1(4) . . . . ? 
C5 C4 C3 C2 0.4(4) . . . . ? 
C4 C3 C2 C1 -0.3(4) . . . . ? 
N1 C1 C2 C3 0.0(4) . . . . ? 
 
_diffrn_measured_fraction_theta_max    0.999 
_diffrn_reflns_theta_full              28.75 
_diffrn_measured_fraction_theta_full   0.999 
_refine_diff_density_max    0.899 
_refine_diff_density_min   -0.801 
_refine_diff_density_rms    0.119 

_iucr_refine_instructions_details
;
TITL SI in P-1
CELL 0.71073   5.4655   6.9612   7.6303  79.842  84.579  89.123
ZERR    1.00   0.0003   0.0004   0.0005  0.0009  0.0010  0.0009
LATT  1
SFAC C H N CL PT
UNIT 10 10 2 2 1
TEMP -173
 
L.S. 10
BOND
CONF
SIZE 0.10 0.08 0.07
FMAP 2
PLAN 5
 
ACTA
 
WGHT    0.017600    0.237300
FVAR       0.84240
PT1   5    0.500000    0.500000    0.000000    10.50000    0.01031    0.01349 =
         0.00958   -0.00151   -0.00016    0.00208
CL1   4    0.448819    0.220057    0.212064    11.00000    0.01904    0.01700 =
         0.01406    0.00090    0.00190    0.00309
N1    3    0.255869    0.639847    0.149100    11.00000    0.01264    0.01352 =
         0.01188   -0.00161    0.00023    0.00035
C5    1    0.056323    0.726697    0.079971    11.00000    0.01454    0.01512 =
         0.01387   -0.00157   -0.00061    0.00023
AFIX  43
H5    2    0.032718    0.723654   -0.041273    11.00000   -1.20000
AFIX   0
C1    1    0.289547    0.644951    0.321126    11.00000    0.01852    0.01641 =
         0.01393   -0.00148   -0.00218   -0.00028
AFIX  43
H1    2    0.430843    0.584216    0.369911    11.00000   -1.20000
AFIX   0
C4    1   -0.115396    0.820243    0.180147    11.00000    0.01366    0.01564 =
         0.02154   -0.00306    0.00067    0.00003
AFIX  43
H4    2   -0.254680    0.880684    0.128121    11.00000   -1.20000
AFIX   0
C3    1   -0.082311    0.825058    0.358053    11.00000    0.01879    0.01678 =
         0.01902   -0.00606    0.00540   -0.00147
AFIX  43
H3    2   -0.198744    0.887915    0.429361    11.00000   -1.20000
AFIX   0
C2    1    0.123883    0.736311    0.428996    11.00000    0.02345    0.02000 =
         0.01383   -0.00497    0.00082   -0.00268
AFIX  43
H2    2    0.151504    0.737962    0.549788    11.00000   -1.20000
 
HKLF 4
 
REM  SI in P-1
REM R1 =  0.0128 for   1478 Fo > 4sig(Fo)  and  0.0128 for all   1478 data
REM     70 parameters refined using      0 restraints
 
END  
     
WGHT      0.0176      0.2373 
REM Highest difference peak  0.899,  deepest hole -0.801,  1-sigma level  0.119
Q1    1   0.5157  0.3861  0.0125  11.00000  0.05    0.90
Q2    1   0.4734  0.4979 -0.0984  11.00000  0.05    0.86
Q3    1   0.3978  0.4878  0.1007  11.00000  0.05    0.71
Q4    1   0.3346  0.4595 -0.0240  11.00000  0.05    0.59
Q5    1   0.4855  0.3595  0.1476  11.00000  0.05    0.57
;

#===END
